# Analyzing ecological networks of species interactions

Eva Delmas <sup>1,2</sup> Mathilde Besson <sup>1,2</sup> Marie-Hélène Brice <sup>1,2</sup> Laura Burkle <sup>3</sup>  
Giulio V. Dalla Riva <sup>4</sup> Marie-Josée Fortin <sup>5</sup> Dominique Gravel <sup>2,6</sup>  
Paulo R Guimarães Jr. <sup>7</sup> David Hembry <sup>8</sup> Erica Newman <sup>10,9</sup> Jens M. Olesen <sup>11</sup>  
Mathias M. Pires <sup>7</sup> Justin D. Yeakel <sup>12,13</sup> Timothée Poisot <sup>1,2</sup>

**1:** Université de Montréal, Département de Sciences Biologiques; **2:** Québec Centre for Biodiversity Sciences; **3:** Montana State University, Department of Ecology; **4:** Beaty Biodiversity Research Centre, University of British Columbia; **5:** Department of Ecology and Evolutionary Biology, University of Toronto; **6:** Université de Sherbrooke, Département de Biologie; **7:** Departamento de Ecologia, Instituto de Biociências, Universidade de São Paulo; **8:** Department of Ecology and Evolutionary Biology, University of Arizona; **9:** School of Natural Resources and Environment, University of Arizona; **10:** Pacific Wildland Fire Sciences Laboratory, USDA Forest Service; **11:** Aarhus University, Department of Bioscience; **12:** University of California Merced, Life & Environmental Sciences; **13:** Santa Fe Institute

Networks provide one of the best representations for ecological communities, composed of many species with sometimes dense connections between them. Yet the methodological literature allowing one to analyse and extract meaning from ecological networks is dense, fragmented, and unwelcoming. We provide a general overview to the field, outlining both the intent of the different measures, their assumptions, and the contexts in which they can be used. We anchor this discussion in examples from empirical studies, and conclude by highlighting what we think should be the future developments in the field.

**Keywords:** ecological networks - interactions - graph theory - community ecology

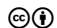

*This work is licensed under a Creative Commons Attribution 4.0 Unported License.*

Correspondence to Timothée Poisot – [timothee.poisot@umontreal.ca](mailto:timothee.poisot@umontreal.ca) – Latest update on May 10, 2017

## CONTENTS

|          |                                                           |           |
|----------|-----------------------------------------------------------|-----------|
| <b>1</b> | <b>What are species interaction networks?</b>             | <b>4</b>  |
| <b>2</b> | <b>What can we learn with ecological networks?</b>        | <b>6</b>  |
| 2.1      | What do communities look like? . . . . .                  | 6         |
| 2.2      | How are communities different? . . . . .                  | 13        |
| 2.3      | What do species do? . . . . .                             | 15        |
| 2.4      | How are species related? . . . . .                        | 21        |
| 2.5      | Is any of this significant? . . . . .                     | 22        |
| 2.6      | Future methods for novel questions . . . . .              | 25        |
| <b>3</b> | <b>What are species interactions networks, revisited?</b> | <b>26</b> |
| <b>4</b> | <b>Conclusions</b>                                        | <b>28</b> |
|          | <b>References</b>                                         | <b>28</b> |

Abu 'Uthman 'Amr ibn Bahr was perhaps the first scientist to provide, as early as in the eighth century, a description of a food chain (Egerton 2002). About a thousand years later, Camerano (1880) introduced the idea that the diversity of animal forms, and therefore the biological diversity itself, can only be explained when framed in the context of inter-relationships between species. "Network-thinking" now permeates almost all areas in ecology and evolution (Proulx et al. 2005), and is one of the fastest growing ecological disciplines (Borrett et al. 2014), accounting for 5% of all published papers in 2012. Network-based approaches are gaining momentum as one of the most helpful tools for the analysis of community structure (Poisot et al. 2016d), because they offer the opportunity to investigate, within a common formal mathematical framework, questions ranging from the species-level to the community-level (Poisot et al. 2016d). Applying network approaches to a variety of ecological systems, for example hosts and parasites (Poulin 2010), or bacteria and phage (Weitz et al. 2013), yields new methodological and biological insights, such as the observation that networks tend to be locally nested but regionally modular (Flores et al. 2013), which suggests that different ecological and evolutionary regimes are involved at different scales. Yet the analysis of ecological networks is still a young field, and this comes with challenges to tackle. First, there is a pressing need for additional methodological developments, both to ensure that our quantitative analysis of networks is correct, and that it adequately captures the ecological realities that are, ultimately, of interest. Second, we need to better understand the limitations and domain of application of current methods. Finally, there is a lack of a consensus on what constitutes a "gold standard" for the representation, analysis, and interpretation of network data on ecological interactions within the framing of specific ecological questions. This last point is especially true in light of a recent proliferation of often poorly-tested methods that presume to measure the same thing. All things considered, the analysis of ecological networks can be confusing to newcomers as well as researchers who are more well-versed in existing methods.

Most notions in community ecology, including the definition of a community (Vellend 2010; Morin 2011), and several definitions of a niche (Holt 2009; Devictor et al. 2010), emphasize the need to study the identity of species and their interactions simultaneously (although ecological network analysis can be critiqued for ignoring species identity in many instances). Studies of ecological communities can therefore not discard or disregard interactions (McCann 2007). With the existence of methods that can analyze (large) collections of interactions, this approach is methodologically tractable. However, working on large number of species and interactions has often been discouraged (McCann 2007), because large networks without a clear focal groupe represent an ecological reality with a too large complexity to allow meaningful analysis or interpretation. There are a number of reasons for which the supposed "complexity" of multi-species assemblages can be interpreted with a lot of caution. First, "complexity" is often used as a catch-all term by ecologists to mean "species rich", "densely connected", or "possessing non-random properties". This terms sacrifices accuracy for the sake of brevity, and most importantly strays far from the formal concept of complexity: that which cannot be adequately described by a finite number of parameters or instructions. Although they are densely connected and markedly non-random, ecological networks can be well described by a reduced number of variables (either nodes and edges, or more global emerging properties) (Eklöf et al. 2013; Poisot & Gravel 2014; Chagnon 2015). In the absence of evidence for *network complexity*, we can safely assume that ecological networks are, at best, merely *complicated*.

Graph theory provides a robust and well formalized framework to handle and interpret interactions between arbitrarily large (or small) numbers of species. Theoretical analyses of small assemblages of interacting species (e.g. "community modules", Holt 1997) have generated key insights on

the dynamics of properties of ecological communities. We expect there is even more to gain by using graph theory to account for structure at increasingly high orders, because there is virtually no upper bound on the number of nodes (species) or edges (interactions) it can be applied to, and theory on large graphs can help predict the asymptotic behaviour of ecological systems. In short, although graph theory may appear as overwhelmingly complicated and unnecessarily mathematical, it lets us express a variety of measures of the structure of networks that can be mapped onto ecologically relevant questions.

Rather than providing a review of the consequences of network structure on ecological properties of communities and ecosystems (see Jordano & Bascompte 2013 for mutualistic systems, and McCann (2012) for food webs), this manuscript aims to establish a framework for how ecological networks can be analyzed. As the variety of network measures available is overwhelming, and as the popularity of network thinking in ecology increases, the field in need of an assessment of the state of its methodological development, which is necessary to determine how we can best analyze data from ecological networks.

## 1 WHAT ARE SPECIES INTERACTION NETWORKS?

Ecological networks of species interactions can efficiently be represented using the mathematical formalism of graph theory. A graph  $G$  is defined as an ordered pair  $(V, E)$ , where every element of  $E$  (the edges) is a two-element subset of  $V$  (the nodes). From this simple structure, we can measure a large number of properties (see *e.g.* Newman 2010 for an introduction). A *simple graph* contains neither self-edges (a node is linked to itself) or multiedges (the same two nodes are linked by more than one unique edge), whereas a *multigraph* contains at least one multiedge. As we illustrate in fig. 1, edges can be *directed* (*e.g.* A eats B), or *undirected* (*e.g.* A and B compete); *unweighted* (*e.g.* A pollinates B) or *weighted* (*e.g.* A contributes to 10% of B's pollination). In the context of studying ecological interactions,  $V$  is a set of ecological objects (taxonomic entities, or other relevant components of the environment), and  $E$  are the *pairwise* relationships between these objects. As both the strengths of interactions and their direction are highly relevant to ecological investigations, data on species interactions are most often represented as *networks*: directed and weighted graphs. We use network as a shorthand for “graph” throughout. Species interaction networks can, finally, be represented as *unipartite* or *bipartite* networks. *Unipartite* networks are the more general case, in which any two vertices can be connected; for example, food webs or social networks are unipartite (Post 2002; Dunne 2006). Unipartite networks can represent interactions between multiple groups; for example, food webs can be decomposed in trophic levels, or trophic guilds. *Bipartite* networks, on the other hand, have vertices that can be divided in disjointed sets  $T$  (*top*) and  $B$  (*bottom*), such that every edge goes *from* a vertex from  $T$ , *to* a vertex from  $B$ ; any ecological community with two discrete groups of organisms can be represented as a bipartite network (parasites and hosts, Poulin 2010; *e.g.* plant and mutualists, Jordano & Bascompte 2013; phage and bacteria, Weitz et al. 2013). It is possible to represent  $k$ -partite networks, *i.e.* networks with  $k$  discrete “levels”. This formalism has been used for resources/consumers/predators (Chesson & Kuang 2008), and other plant-based communities (Fontaine et al. 2011). Tripartite networks are usually analyzed as collections of bipartite networks, or as unipartite networks. There still exists little data on ecological  $k$ -partite networks, and it is therefore difficult to establish solid recommendation about how they can be analyzed; this is a part of the field in which methodological development is still needed and ongoing.

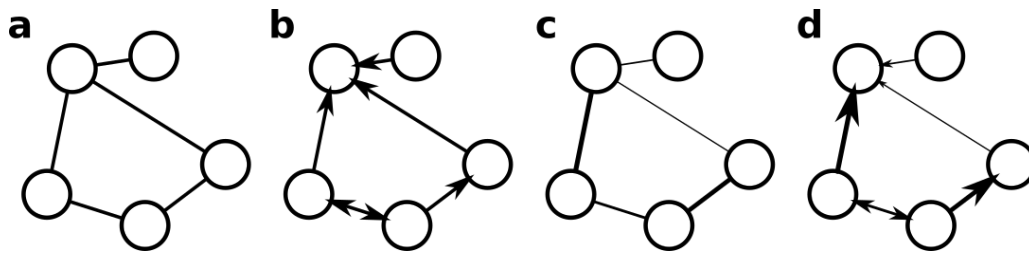

**Figure 1** Differences between (un)weighted and (un)directed graphs. Graphs A and C are undirected, and graphs B and D are directed. Graphs A and B are unweighted, and graphs C and D are weighted.

Networks can be represented using their *adjacency matrix* ( $\mathbf{A}$ ). For a unipartite network containing  $S$  species,  $\mathbf{A}$  is a square matrix of dimensions  $(S, S)$ . For a bipartite network containing  $T + B$  species, the dimensions are  $(T, B)$ , and the  $\mathbf{A}$  matrix is usually referred to as the *incidence matrix*. In both cases, the elements  $a_{ij}$  of the matrix indicate whether species  $i$  interact with species  $j$ . In unweighted networks,  $a_{ij} = 1$  when  $i$  and  $j$  interact and 0 otherwise. In weighted networks the strength of the interaction is given, instead of being set to unity. Note that in weighted networks, the strength of the interaction is not necessarily between 0 and 1; if the strength of interactions depicts the raw effect of one population on another, then it can take on both negative and positive values. The adjacency matrix is symmetrical for undirected networks, because  $a_{ij} = a_{ji}$ . In simple networks, the matrix diagonal is empty as there are no self-edges (which, ecologically, could represent autophagy, breastfeeding in mammals or cannibalism). We would like to note that  $\mathbf{A}$  is not the *de facto* community matrix: in some situations, it can be more profitable to describe the community using its Jacobian matrix, *i.e.* one in which  $a_{ij}$  represents the net effect of species  $i$  on species  $j$  (Gravel et al. 2016b; Monteiro & Faria 2016; Novak et al. 2016).

Species interaction networks are compiled and resolved for a multitude of taxonomic and organisational levels (Thompson & Townsend 2000): individuals (Araújo et al. 2008; Dupont et al. 2009, 2014; Melián et al. 2014); species (Morand et al. 2002; Krasnov et al. 2004); at heterogeneous taxonomic resolutions, including species, genera, and more diffusely defined “functional” or “trophic” species (Martinez et al. 1999; Baiser et al. 2011); groups of species on the basis of their spatial distribution (Baskerville et al. 2011). This is because species interaction networks are amenable to the study of all types of ecological interactions, regardless of the resolution of underlying data: mutualistic, antagonistic, competitive, and so on. Recent developments made it possible to include more than one type of interaction within a single network (Fontaine et al. 2011; Kéfi et al. 2012), which allows greater ecological realism in representing communities having several types of interactions (*e.g.*, plants are consumed by herbivores, but also pollinated by insects). Such networks are instances of *multigraphs*. Another development accounts for the fact that ecological interactions may have effects on one another, as proposed by *e.g.* Golubski & Abrams (2011); these are *hypergraphs*. Hypergraphs are useful when interactions rely, not only on species, but also on other species interactions: for example, an opportunistic pathogen may not be able to infect a healthy host, but may do so if the host’s immune system is already being compromised by another infection. Hence it is not only species, but also their interactions, which interact. As both of these developments are recent, there is little methodology to describe systems represented as multigraphs or hypergraphs, and we will only mention them briefly going forward. In a way, methodological developments on these points is limited by the lack of data to explore their potential. As the interest among network ecologists will increase for systems in

which the current paradigm of species–species interactions falls short, we expect that the inflow of data will stimulate the emergence of novel methods.

Identifying interactions across ecological entities can be done in a variety of ways, ranging from literature survey and expert knowledge, direct or indirect observation in the field using gut content (Carscadden et al. 2012), stable isotopes, molecular techniques such as meta-barcoding and environmental DNA (Evans et al. 2016; O’Donnell et al. 2017), to modelling based on partial data or mechanistic models. Depending on how they were assembled, species interaction networks can represent a multitude of ecological realities. When based on field collection (Morand et al. 2002; Bartomeus 2013; Carstensen et al. 2014), they represent *realized* interactions, known to have happened (unreported interactions can be true or false absences, depending on sampling effort among other things). Another common method is to “mine” the literature (e.g. Havens 1992; Strong & Leroux 2014) or databases (e.g. Poisot et al. 2016c), to replace or supplement field observations. In this situation, species interaction networks describe *potential* interactions: knowing that two species have been observed to interact once, *there is a chance* that they interact when they co-occur. Another more abstract situation is when interactions are inferred from a mixture of data and models, based on combinations of abundances (Canard et al. 2014), body size (Gravel et al. 2013; Pires et al. 2015), or other traits (Crea et al. 2015; Bartomeus et al. 2016). In this situation, species interaction networks are a *prediction* of what they could be. In keeping with the idea of “networks as predictions”, a new analytical framework (Poisot et al. 2016b) allows working directly on probabilistic species interaction networks to apply the family of measures presented hereafter.

## 2 WHAT CAN WE LEARN WITH ECOLOGICAL NETWORKS?

For this part, unless otherwise stated, we will focus on describing measures of the structure of unweighted, directed networks (*i.e.* either the interaction exists, or it does not; and we know which direction it points), to the exclusion of quantitative measures that account for the *strength* of these interactions. In most of the cases, quantitative variations of the measures we present exist (see e.g. Bersier et al. 2002), and share a similar mathematical expression. There is a long-standing dispute (Post 2002) among ecologists as to whether “arrows” in networks should represent biomass flow (e.g. from the prey to the predator) or interaction (e.g. from the predator to the prey). Because not all interactions involve biomass transfer, and because networks may be used to elucidate the nature of interactions, we will side with the latter convention. In general, we will assume that the interaction goes *from* the organism establishing it *to* the one receiving it (e.g. from the pollinator to the plant, from the parasite to the host, etc).

### 2.1 *What do communities look like?*

#### 2.1.1 *Order, size and density*

During the last decades, various network measures have been developed to characterize the general structure of interacting communities, capturing both species identity and their interactions (Dunne et al. 2002b; Montoya et al. 2006; Allesina & Pascual 2007; Thompson et al. 2012). Most

of these measures encompass and supplement usual measurements in community ecology. In addition to how many species are there, and which species are in local area, knowledge of their interactions is indeed an additional layer of information that network measures exploit to quantify biodiversity.

A first descriptor of a network is its *order* ( $S$ ), *i.e.* the total number of nodes. If nodes are species, order measures the species richness of the community described by the network  $G$ . The total number of edges ( $L$ ) is the *size* of the network. From these two measures is computed the *linkage density*  $\frac{L}{S}$  (*e.g.* Bartomeus 2013), which is the mean number of edges per node – or simply, if a random species is selected, how many edges would it be expected to have. Linkage density should be considered with caution as it can be misleading: the distribution of edges among nodes in species interaction networks is rarely uniform or normal (Williams 2011), and a minority of species are known to establish a majority of interactions (Dunne et al. 2002a). Moreover  $L$  is known to scale with  $S^2$  (Cohen & Briand 1984; Martinez 1992), at least in trophic interaction networks.

This observation that  $L$  scales with  $S^2$  has cemented the use of an analog to linkage density, the *connectance* ( $C$ ), as a key descriptor of network structure (Martinez 1992). Connectance is defined as  $\frac{L}{m}$ , *i.e.* the proportion of established interactions ( $L$ ), relative to the possible number of interactions  $m$ . The value of  $m$  depends of the type of network considered. In a unipartite directed network,  $m$  is  $S^2$ . In a directed network in which species cannot interact with themselves,  $m$  is  $S(S - 1)$ . In an undirected network,  $m$  is  $S\frac{S-1}{2}$  if the species cannot interact with themselves, and  $S\frac{S+1}{2}$  if they can. In a bipartite network,  $m$  is  $T \times B$ , the product of the number of species at each level. The connectance varies between 0 if the adjacency matrix is empty to 1 if its entirely filled. It is also a good estimate of a community sensitivity to perturbation (Dunne et al. 2002a; Montoya et al. 2006) as well as being broadly related to many aspects of community dynamics (Vieira & Almeida-Neto 2015). Although simple, connectance contains important information regarding how links within a network are distributed, in that many network properties are known to strongly covary with connectance (Poisot & Gravel 2014; Chagnon 2015), and the fact that most ecological networks “look the same” may be explained by the fact that they tend to exhibit similar connectances (fig. 2). Poisot & Gravel (2014) derived the *minimum* number of interactions that a network can have in order for all species to have at least one interaction. This allows us to express connectance in the  $[0; 1]$  interval, where 0 indicates that the network has the least possible number of interactions.

### 2.1.2 Edges repartition within the networks

The majority of real-world species interaction networks are highly heterogeneous with regard to edges distribution among nodes. This distribution can be studied as such (through the *degree distribution*), but also reflects a particular organization of the network, which can also be studied. Quantitative measures of different structures have been developed from graph theory and have played a growing role in understanding the evolution and functioning of ecological communities – in particular, because these measures add a small amount of information (compared to measures presented later in this manuscript), they are a natural first step in moving away from a species-centric view of community into the arguably more realistic species-and-interactions view that networks capture well.

The *degree* of a node is its number of edges, then the *degree distribution*  $P(k)$  measures the

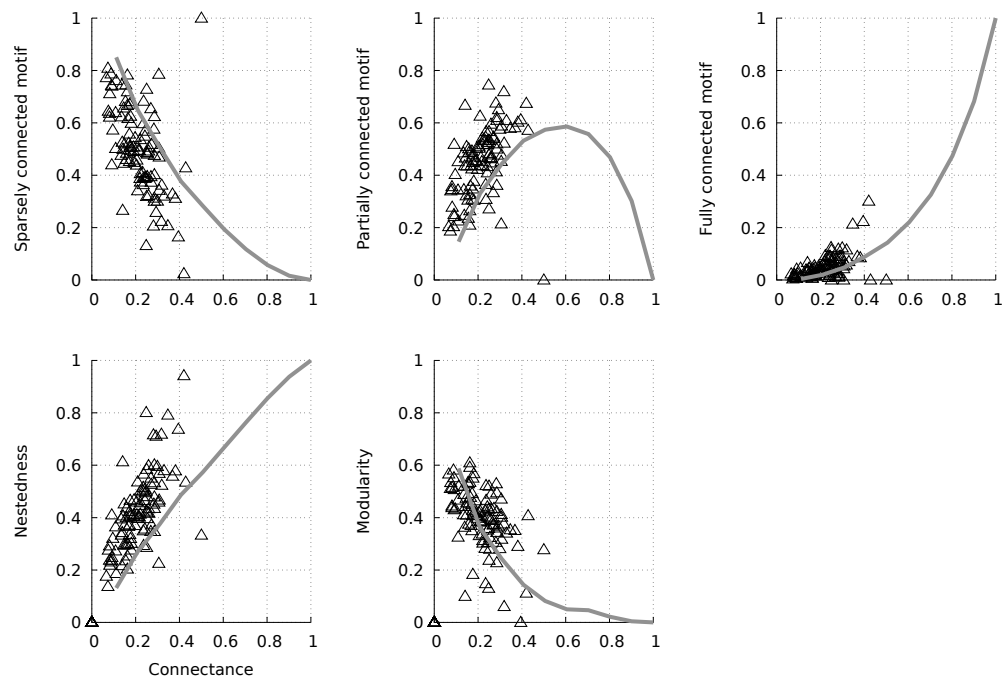

**Figure 2** To illustrate the strong relationship between connectance and other network measures, we generated random bipartite networks (lines) with 15 species on the top, 30 on the bottom, and connectances ranging from 0.1 to unity. For each of these networks, we measured their nestedness using  $\eta$ , their modularity (best partition out of 100 runs), and the relative frequencies of three bipartite motifs between two species from the top and two species from the bottom. The sparsely connected motif corresponds to two independent interactions. The partially connected motif represents the addition of one interaction to the sparsely connected one, and the fully connected is the addition of another interaction. All of these measures have a strong covariance with connectance, and for this reason, the comparison of networks with different connectances must rely on randomizations. Empirical data from pollination networks are shown for reference (triangles). Data, methods, and code: <https://osf.io/82ypq/>.



probability that a species has  $k$  edges within the network. The degree distribution can be calculated as  $P(k) = N(k)/S$  where  $N(k)$  is the number of nodes with  $k$  edges, and  $S$  is the number total of species in the network. The degree distribution allows identification of important nodes, such as potential keystone species (Solé & Montoya 2001 ; Dunne et al. 2002b), generalists, and specialist species (Memmott et al. 2004). In directed networks, the degree distribution can be divided into *in-degree* and *out-degree*. These respectively correspond to species *vulnerability* (e.g. number of predators in food webs) and *generality* (e.g. number of resources in food webs). It is often assumed that the distribution of degree in networks should resemble a power law (Strogatz 2001; Caldarelli 2007). In other words, the proportion  $P(k)$  of nodes with degree  $k$  should be proportional to  $k^{-\gamma}$  (but see see Jordano et al. 2003 – a truncated power-law may be a more accurate description). Dunne et al. (2002a) found that, at least in food webs, ecological networks tend not to be small-world or scale-free, but deviate from these rules in small yet informative ways that hold ecological information. The power law essentially describes the expected behavior of nodes in a network in a constraint-free world, although this is unlikely to apply to ecological systems. We instead suggest that deviations from the power law be analysed as having ecological meaning: why there are more, or fewer, species with a given frequency of interactions may reveal reasons for and/or constraints on particular species interactions.

The network *diameter* gives an idea of how quickly perturbations may spread by providing a measure of how dense the network is. Diameter is measured as the longest of all the shortest *distances* ( $d_{ij}$ ) between every pairs of nodes in the graph (Albert & Barabási 2002), where  $d_{ij}$  is the length of the shortest path (sequence of edges) existing between the nodes  $i$  and  $j$ . A small diameter indicates presence of a densely connected nodes, or hubs, hence fast propagation between nodes which may make the network more sensitive to perturbation (e.g. rapid spread of a disease, Minor et al. 2008). The diameter is relative to the number of nodes in the network, since it relies on counting the number of edges in a path, which may become larger as the network order increases. To overcome this issue, the diameter can also be measured as average of the distances between each pair of nodes in the network.

### 2.1.3 Aggregation of nodes based on their edges

From the heterogeneous repartition of interactions between nodes in species interaction networks, certain structures and grouping of edges around nodes emerge. While the degree distribution hints at how edges are organized around single nodes, one can frame this question at the scale of the entire network. It is likely that other structure will appear when multiple nodes are considered at once. This can be done by analyzing what types of relationships the nodes (representing species, etc) are typically embedded in (e.g. competition, intraguild predation), through the analysis of *motifs distribution*, or by determining if there are nodes found in dense *clusters* or non-overlapping *compartments*, forming *modular* communities.

Species interaction networks can be decomposed in smaller subgraphs of  $n$  species, called motifs (Milo et al. 2002). The smallest modules to which they can be decomposed are three-species motifs (Holt 1997). The relative frequencies of each of these motifs holds information about network structure. There are thirteen possible three-nodes motifs in directed networks, each representing a different relationship between three nodes, such as competition between A and B for a shared resource C ( $A \rightarrow C \leftarrow B$ ), or a linear chain between A, B and C ( $A \rightarrow B \rightarrow C$ ). Among these thirteen motifs, some are present in species interaction networks with a lower or higher frequency that what is expected in random networks. Motifs distributions are characteristic of network

type (neuronal, electrical, social, ecological, and so on). In food webs for example, motifs' under- and over-representation has been found to be consistent across different habitats (Camacho et al. 2007; Stouffer et al. 2007; Borrelli 2015). In ecological networks, motifs have been referred to as the *basic building blocks of communities*, as they represent typical relationship between species. Studying their distribution (*i.e.* how many of each type of motif is there in this network) offers an opportunity to bridge the gap between two traditional approaches (Bascompte & Melián 2005), namely the study of the dynamics of simple modules such as omnivory or linear food chain (Pimm & Lawton 1978; Holt 1996; McCann et al. 1998), and the analysis of aggregated metrics describing the community as a whole. Motif distributions have been used to study the processes underlying the assembly and disassembly of ecological communities (Bastolla et al. 2009), as well as of the link between communities' structure and dynamics (Stouffer & Bascompte 2011). More recently, motifs have also been used to define species trophic roles in the context of their community (Baker et al. 2014) and link this role to the network's stability (Borrelli 2015).

The *clustering coefficient* is useful to estimate the “cliquishness” of nodes in a graph (Watts & Strogatz 1998) – that is their grouping in closely connected subsets. It measures the degree to which the neighbours of a node are connected (the neighborhood of a node  $i$  is composed of all of the nodes that are directly connected to  $i$ ). In other words, it gives an idea of how likely it is that two connected nodes are part of a larger highly connected group or “clique”. Two different versions of the clustering coefficient ( $CC$ ) exist. First, it can be defined locally, for each node  $i$  (Watts & Strogatz 1998). In this case  $cc_i = \frac{2N_i}{k_i(k_i-1)}$  where  $k_i$  is  $i$ 's degree (its number of neighbors) and  $N_i$  is the total number of interactions between  $i$ 's neighbors. It describes the fraction of realized edges between  $i$ 's neighbors and thus vary between 0 (none of  $i$ 's neighbors are connected) and 1 (all of them are connected, forming a “clique”). From this measure, we can calculate the average local clustering coefficient:  $CC_1 = \frac{\sum_i c_i}{S}$  where  $S$  is the total number of nodes. This first version describes the “cliquishness” of a typical neighborhood, but has the drawback of giving more influence to nodes with a small degree. Nevertheless, the clustering coefficient provides a way of characterising the structure of the graph through the analysis of  $CC_k$ , which is the average of the  $cc_i$  of all nodes of degree  $k$ , and specifically of the distribution of  $CC_k$  across multiple values of  $k$ . The clustering coefficient can also be defined globally, for the entire graph (Soffer & Vazquez 2005; Saramäki et al. 2007) and is calculated as follows  $CC_2 = \frac{3N_t}{N_c}$ , where  $N_t$  is the number of triangles in graph  $G$  ( $a$  is connected to  $b$  and  $c$ ,  $b$  to  $a$  and  $c$  and  $c$  to  $a$  and  $b$ ) and  $N_c$  is the number of 3-nodes subgraphs (*e.g.*  $a$  is connected to  $b$  and  $c$ ,  $b$  and  $c$  are connected to  $a$  but not to each other). Kim (1993) suggested that this property of a network can be used to infer competition, but this has to our knowledge received little attention in ecology.

Whereas clustering analysis gives information about the grouping of nodes within their immediate neighbourhood (but no information about the identity of nodes in this neighborhood), a measure of modularity gives a similar information at a larger scale. Network modularity measure how closely connected nodes are divided in *modules*, also called *compartments* (Olesen et al. 2007). A module is defined as a subsystem of non-overlapping and strongly interacting species. The modular structure of graphs has been studied because of its dynamical implications, in that modularity promotes stability by containing perturbations within a module, thereby constraining their spreading to the rest of the community (Stouffer & Bascompte 2010, 2011). This has been a key argument in the diversity-stability debate (Krause et al. 2003). A major challenge when studying species interaction networks's modularity is to find the best subdivision of the network. Several methods have been developed for this purpose, including the optimization of a modularity function (Guimerà et al. 2004; Newman 2004; Newman & Girvan 2004; Guimerà & Amaral 2005;

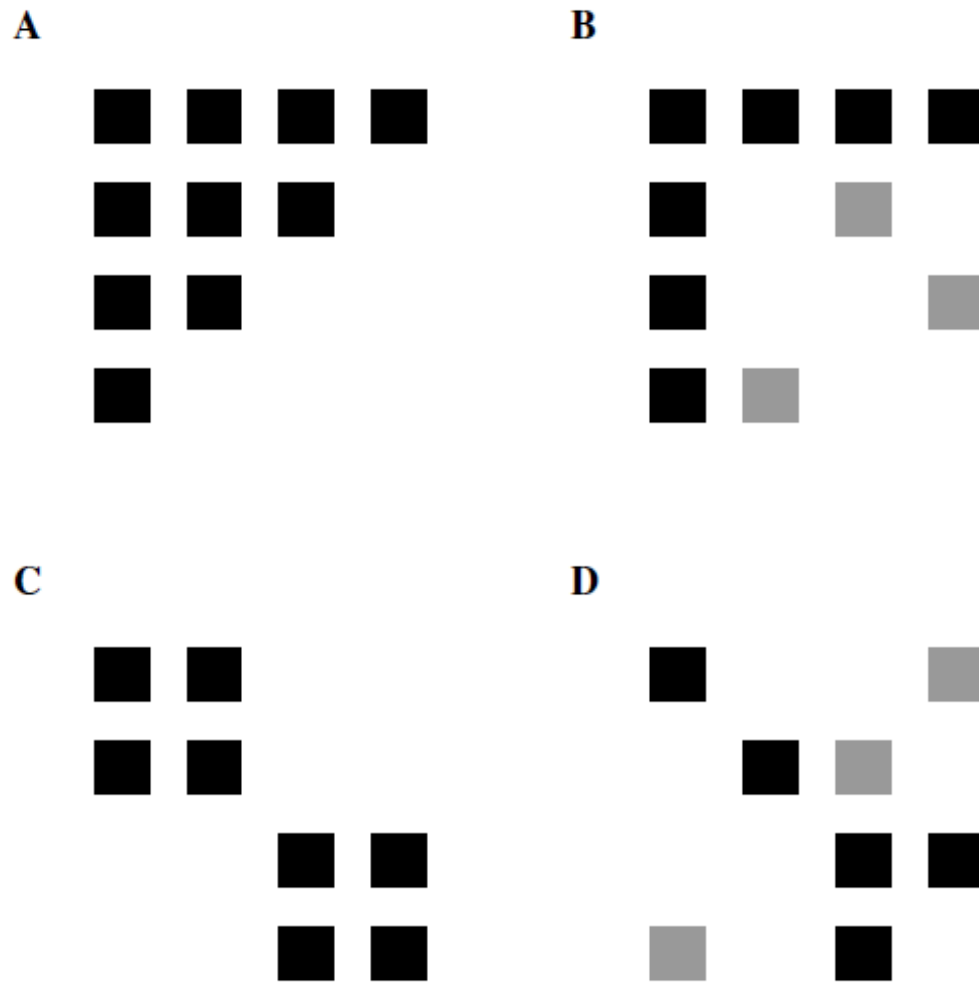

**Figure 3** Illustration of the nested and modular structure of networks, represented as matrices. A is a perfectly nested matrix; in B, three interactions (in grey) have been displaced to lose the perfectly nested structure. C is a perfectly modular network; in D, three interactions have been displaced to lose the modular structure.

Guimerà & Nunes Amaral 2005). The principle underlying this function is to find the optimal subdivision that maximizes the number of interactions within modules while minimizing the number of edges between modules. The calculated modularity is then compared with a null model that has the same number of links and nodes, with the links connected to each other randomly. Modularity optimization has a resolution limit (in that its performance decreases with the size of the network) making it less reliable for large species interaction networks (Fortunato & Barthélemy 2007); there are methods designed specifically to work on thousands of nodes and more (see *e.g.* Liu & Murata 2009). To compare outcomes of different modularity measurements, it possible to use an *a posteriori* method. In a network where modules are already found, the realized modularity ( $Q'_R$ ) measure the proportion of edges connecting nodes within modules (Poisot 2013). This is expressed as

$$Q'_R = 2 \times \frac{W}{L} - 1, \quad (1)$$

where  $W$  is the number of edges *within* modules, and  $L$  is the total number of edges. This takes on a value of 1 when modules are disconnected from one another (which is not true of other modularity functions that account for the probability of establishing an edge). This measure can take on negative values if there are more edges between modules than within them, which can be viewed as a non-relevant partitioning of the community.

#### 2.1.4 *Nestedness*

species interaction networks can also present a *nested* structure, where the species composition of small assemblages are subsets of larger assemblages. In food webs, a nested structure occurs when the diet of the specialist species is a subset of the diet of the more generalist species – and where the predators of species are nested as well. The analysis of nestedness has revealed ecological and evolutionary constraints on communities. For example, it has been hypothesized that a nested structure promotes a greater diversity by minimizing competition among species in a community (Bastolla et al. 2009). Various metrics have been developed to quantify nestedness (Ulrich 2009; Ulrich et al. 2009). Most are based on the principle that when a matrix is ordered by rows and columns (that is descending in rank from above and from the left) a nested networks will present a concentration of presence data in the top-left corner of the matrix, and a concentration of absence data in the opposite corner (see Staniczenko et al. 2013 for an exception). Numerous studies (Rodríguez-Girones & Santamaría 2006; Fortuna et al. 2010; Flores et al. 2011) use the proportion of unexpected presence or absence in the matrix to quantify nestedness. Seemingly the most widely used measure of nestedness is NODF (nestedness measure based on overlap and decreasing fills), as suggested by Almeida-Neto et al. (2007); Bastolla et al. (2009) designed  $\eta$  as an improvement over NODF, that does not require a re-ordering of the nodes (*i.e.* there is no need to put the most densely connected nodes first, and the least densely connected nodes last). As per Bastolla et al. (2009),  $\eta$  is defined as:

$$\eta(\mathbf{A}) = \frac{\sum_{i < j} n_{ij}}{\sum_{i < j} \text{minimum}(n_i, n_j)} \quad (2)$$

where  $n_{ij}$  is the number of common interactions between species  $i$  and  $j$ , and  $n_i$  is the number of

interactions of species  $i$ . Note that this formula gives the nestedness of rows with regard to the columns, though one can also measure the nestedness of columns with regard to rows as  $\eta(A')$ , and calculate the nestedness of the whole system as the average of these two values. We suggest that, since it does not rely on species re-ordering,  $\eta$  can be used over NODF or other nestedness measures. There are some caveats to this argument, however. First, the number of permutations for NODF is known, and for networks of a small size, they can be computed in a reasonable time. Second, NODF can help understanding how different orderings of the matrix (e.g. using traits instead of degree) contributes to nestedness – if this is the question of interest, then NODF is the logical choice. Once ordered by degree, NODF and  $\eta$  are identical (with the exception that NODF accounts for decreasing fill, whereas  $\eta$  does not).

### 2.1.5 *Intervality*

A last measure of species interaction networks structure is their intervality. The first step in calculating intervality is to identify a common trait along which nodes can be ordered. This can be body mass in the case of food webs, but can also be a property derived from their position in the network, such as their degree; indeed, a nested bipartite network is interval when species are organized by decreasing degree. Intervality then measures how well interactions of all species can be described by this trait. A network is called *interval* when it can be fully explained by one dimension (trait). An interval food web with species ordered by their body mass, as an example, has predator eating a consecutive range of preys, that all fall into a range of body masses (Eklöf & Stouffer 2016), or are closely related from a phylogenetic standpoint (Eklöf & Stouffer 2016). Most unipartite ecological networks are close to being interval with one or several dimensions, such as defined by body size (Zook et al. 2011) or arbitrary traits derived from the interactions themselves (Eklöf et al. 2013). There are several methods to quantify a network's intervality. Cattin et al. (2004) have measured the “level of diet discontinuity” using two measures: (i) the proportion of triplet (three species matrix) with a discontinuous diet (*i.e.* at least one species gap), in the whole food web ( $D_{diet}$ ), and (ii) the number of chordless cycles ( $C_{\gamma_4}$ ). A cycle of four species is considered as chordless if at least two species out of the four are not sharing prey, so the diets cannot be totally interval. Nevertheless, these two measures only give a local estimation of the intervality. Stouffer et al. (2006) proposed to measure the intervality of the entire network by re-organizing the interaction matrix to find the best arrangement with the fewer gaps in the network. This is a stochastic approach that by definition does not guarantee to find the global optimum, but has the benefit of working at the *network* scale rather than at the scale of triplets of species.

## 2.2 *How are communities different?*

Detecting spatial and temporal variation in ecological networks, and associating these variations to environmental factors, may yield insights into the underlying changes in ecosystem functions, emergent properties, and robustness to extinction and invasion ( Tylianakis et al. 2007; Tylianakis & Binzer 2013). These efforts have been hindered by the difficulty of quantifying variation among interaction networks. The challenge lies in finding a meaningful way to measure the dissimilarity between networks (Dale & Fortin 2010). Given the ecological properties or processes of interest, a direct comparison – not always computationally tractable – may not be necessary.

Hence, networks can be indirectly compared through their properties (*e.g.* degree distribution, connectance, nestedness, modularity, etc.). Multivariate analyses of network metrics have been used to estimate the level of similarity between different networks (Vermaat et al. 2009; Baiser et al. 2011), while null models were used to statistically compare observed values to their expected random counterparts (*e.g.* Flores et al. 2011). These methods are not entirely satisfactory. The *actual* variation in species interaction networks can be measured more easily in a replicated context: given the same species, what are the causes that make them interact in the same way, or not? Quantifying actual variation in network structure can be achieved through a different approach to sampling, where instead of relying on the sampling of a large number of networks in different environments, efforts are focused on the same system at reduced spatial or temporal scales. The development of methods to analyse replicated networks is still hampered by the lack of such data; this is especially true in food webs. Replicated food webs based only on the knowledge of the local species and their potential interactions (*e.g.* Havens 1992) is not always appropriate: by assuming that interactions always happen everywhere, we do not capture all sources of community variation (in addition to the issue of co-occurrence being increasingly unlikely when the number of species increases). Sampling of ecological networks should focus on the replicated documentation of interactions within the same species pool, and their variation in time and space (Poisot et al. 2012; Carstensen et al. 2014; Olito & Fox 2015), as opposed to relying on proxies such as comparison of different communities across space (Dalsgaard et al. 2013), or time (Roopnarine & Angielczyk 2012; Yeakel et al. 2014).

### 2.2.1 *Relationship between key network properties*

Analysis of network structure measures has so far played a central role in the comparison of networks and in the search for general rules underpinning their organization (Dunne 2006; Fortuna et al. 2010). Notably, the number of species affects the number of interactions in real ecological networks (Martinez 1992; Brose et al. 2004), and thus many other network properties (Dunne 2006). The trivial aspects of the networks covary with essential aspects of the network, such as species abundance distributions (Blüthgen et al. 2008; Vázquez et al. 2012; Canard et al. 2014), network dimensions and sampling intensity (Martinez et al. 1999; Banašek-Richter et al. 2004; Chacoff et al. 2012). This issue can seriously limit the interpretation of network measures and their use for network comparison. Furthermore, most of these measures are highly correlated among themselves: Vermaat et al. (2009) report that network multidimensionality can be reduced largely along three major axes related to connectance, species richness (which is tied to connectance because the number of interactions scales with the number of species) and primary productivity (which is hard to measure, and is not easily defined for all systems). More recently, Poisot & Gravel (2014) and Chagnon (2015) showed that because of constraints introduced by the interaction between connectance and network size, the covariation of the simplest measures of network structure is expected to be very strong. As a consequence, it is barely possible to make robust network comparisons using the variations in these basic descriptors. We therefore need to go beyond these global network properties, and find meaningful alternatives that allow a better understanding of the ecological differences between networks.

### 2.2.2 Higher order differences in structure

Other methods accounting for the structure of the entire network have been developed. For example, some methods are based on the frequency distribution of small subnetworks including network motifs (Milo et al. 2002) and graphlets (a more general definition of motifs; Przulj 2007; Yaverolu et al. 2015). The method of graph edit distance gives edit costs (each modification to the graph counts for one unit of distance) for relabeling nodes, as well as insertion and deletion of both nodes and edges (Sanfeliu & Fu 1983), and therefore provides a well-defined way of measuring the similarity of two networks. Other suitable measures to determine network similarity are based on graph spectra (Wilson & Zhu 2008; Stumpf et al. 2012). Spectral graph theory (which is yet to be applied comprehensively to the study of species interaction networks, but see Lemos-Costa et al. (2016)) characterizes the structural properties of graphs using the eigenvectors and eigenvalues of the adjacency matrix or the closely related Laplacian matrix (the Laplacian matrix, defined as  $\mathbf{D} - \mathbf{A}$ , wherein  $\mathbf{D}$  is a matrix filled with 0's in the off-diagonal elements, and the degree of each node on the diagonal, accounts both for network structure and for degree distribution). Some methods allow the algorithmic comparison of multiple networks in which no species are found in common (Faust & Skvoretz 2002; Dale & Fortin 2010), and are primarily concerned about the overall statistical, as opposed to ecological, properties of networks.

### 2.2.3 Ecological similarity and pairwise differences

All of the aforementioned methods focus on the mathematical similarity of networks rather than their ecological similarity. To fill this gap, Poisot et al. (2012) presented a framework for measurement of pairwise network dissimilarity, accounting both for species and interaction turnover through space, time or along environmental gradients. Following Koleff et al. (2003), this approach partitions interactions in three sets: shared by both networks, unique to network 1, and unique to network 2. The  $\beta$ -diversity can be measured by comparing the cardinality of these three sets to reflect symmetry of change, gain/loss measures, nestedness of interaction turnover, etc. This method of network  $\beta$ -diversity can also be extended to multiple network comparisons using their relative difference from the same meta-network. While many measures of  $\beta$ -diversity exist to analyse compositional data, there is still a lack of a comprehensive methodology regarding their applications to networks. A large part of the issue stems from the fact that species interactions require the species pair to be shared by both community, and thus measures of network  $\beta$ -diversity is strongly constrained by the structure of species co-occurrence. Absent co-occurring species pairs, or if no two networks have common species, these methods cannot be applied. None of the current methods seem sufficient for characterizing the structure for a meaningful comparison and extracting information hidden in the topology of networks, and the development of future methods that work regardless of species composition seems like a straightforward high-priority topic.

## 2.3 What do species do?

Not all species in large communities fulfill the same ecological role, or are equally important for processes and properties acting in these communities. As species interactions are a backbone for fundamental mechanisms such as transfer of information and biomass, one can expect that the

role of a species reflects its position within its community, organized by trophic level, abundance, body size or other ecologically meaningful organizing principle. In species interaction networks, it is possible to measure the position and the role of species in different ways, giving different ecological information.

### 2.3.1 Centrality

Centrality is a measure of how “influential” a species is, under various definitions of “influence”. It has been used to suggest possible keystone species in ecological networks (Jordán & Scheuring 2004; Martín González et al. 2010). We would like to note that the ability of network structure measures to identify keystone species is highly dubious; the canonical definition of a keystone species (Paine 1969) requires knowledge about biomass and effects of removal, which are often not available for network data, and make predictions that are primarily about species occurrences. These measures may be able to identify list of candidate keystone species, but this requires careful experimental / observational validation. Nevertheless, knowledge of network structure allows us to partition out the effect of every species in the network. For example, in networks with a nested structure, the core of generalist species have higher centrality scores, and the nested structure thought to play an important role for network functioning and robustness (Bascompte et al. 2003). We provide an illustration of some centrality measures in fig. 4.

Degree centrality ( $C_D(i) = k_i$ ; Freeman (1977)) is a simple count of the number of interactions established by a species. In directed networks, this measure can be partitioned between in-degree (interactions from others to  $i$ ) and out-degree (interaction from  $i$  to other). It is a *local* measure, that quantifies the immediate influence between nodes. As an example, in the case of a disease, a node with more interactions will be more likely both to be infected and to contaminate more individuals (Bell et al. 1999). To compare species’ centrality,  $C_D$  has to be normalized by the maximum degree ( $\langle C_D \rangle = C_D/k_{\max}$ ).

Closeness centrality ( $C_C$ ) (Freeman 1978; Freeman et al. 1979) measures the proximity of a species to *all* other species in the network, and is therefore *global* in that, although defined at the species level, it accounts for the structure of the entire network. It is based on the shortest path length between pairs of species and thus indicates how rapidly/efficiently a node is likely to influence the overall network. The node with the highest  $C_C$  is closer to all other node than any other node and will thus affect more rapidly the overall network if, for example, there is a perturbation (Estrada & Bodin 2008). Formally,  $C_C$  is defined as

$$C_C(i) = \sum_{j \neq i} \frac{n-1}{d_{ji}}, \quad (3)$$

where  $d_{ij}$  is the shortest path length between  $i$  and  $j$ , and  $n$  is the number of species.

Betweenness Centrality ( $C_B$ ) (Freeman 1977) describes the number of times a species is *between* a pair of other species, *i.e.* how many paths (either directed or not) go through it. This measure is thus ideal to study the influence of species loss on fragmentation processes for example (Earn 2000; Chadès et al. 2011; McDonald-Madden et al. 2016). Nodes with high  $C_B$  values are considered as modules connectors in the network. The value of  $C_B$  is usually normalized by the number of



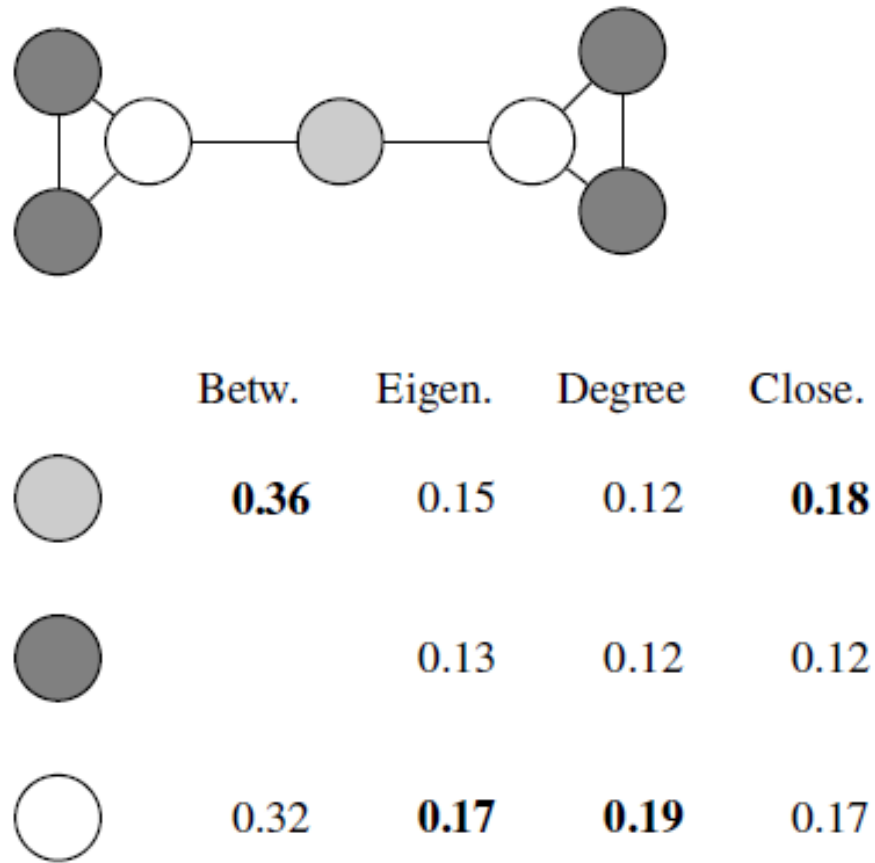

**Figure 4** On the simple graph depicted in the top (nodes of the same color have the same centralities), we measured centrality using betweenness, eigen centrality, degree centrality, and closeness. The values have been corrected to sum to unity. The value in bold gives the most central family of nodes for the given measure. This example illustrates that different measures make different assumptions about what being “central” mean.

pairs of species in the network excluding the species under focus, and is measured as

$$C_B(i) = 2 \times \sum_{j < k; i \neq j} \frac{g_{jk}(i)/g_{jk}}{(n-1)(n-2)}, \quad (4)$$

where  $g_{jk}$  is the number of paths between  $j$  and  $k$ , while  $g_{jk}(i)$  is the number of these paths that include  $i$ .

Eigenvector centrality ( $C_E$  – Bonacich 1987) is akin to a simulation of flow across edges, in which each species influences all of its partners simultaneously. It then measures the relative importance of species by assigning them a score on the basis that an interaction with more influential species contribute more to a species' score than the same interaction with a low-scoring species (Allesina & Pascual 2009). From a graph adjacency matrix  $\mathbf{A}$ , the eigenvector centrality of species  $i$  is given by

$$C_E(i) = \frac{1}{\lambda} \sum_j \mathbf{A}_{ij} C_E(j), \quad (5)$$

where  $\mathbf{A}_{ij}$  is 1 if  $i$  interacts with  $j$  and 0 otherwise, and  $\lambda$  is a constant. This can be rewritten as the eigenvector equation:

$$\mathbf{A}\mathbf{c} = \lambda\mathbf{c}, \quad (6)$$

wherein  $\mathbf{c}$  is the vector of all values of  $C_E$ . As all values of  $C_E$  have to be positive, as per the Perron-Frobenius theorem,  $\lambda$  is the greatest eigenvalue of  $\mathbf{A}$ .

Finally, Katz's centrality ( $C_K$  – Katz 1953) is a measure of the influence of a node in the network. This measure takes into account all the edges connecting a node to its neighborhood. However, an immediate neighbor has more weight than a distant one.  $C_K$  is defined as

$$C_K(i) = \sum_{k=1}^{\infty} \sum_{j=1}^n \alpha^k \mathbf{A}_{ij}^k, \quad (7)$$

wherein  $\alpha$  is the *attenuation constant*, and  $k$  is the length of the paths between  $i$  and  $j$ . The  $\alpha$  value is between 0 and  $1/\lambda$ , where  $\lambda$  is the largest eigenvalue of  $\mathbf{A}$ . Larger values of  $\alpha$  give more importance to distant connections, thus allowing this measure to function either locally (immediate neighborhood) or globally (entire graph).  $C_K$  can be used in directed acyclic graphs (e.g. trees), which is not true of  $C_E$ . This is also the only measure to have a probabilistic equivalent (Poisot et al. 2016b).

Studying different measures of centrality provide important information regarding the roles of certain species/nodes. As an example, a species may have a low  $C_D$  and a high  $C_B$ , meaning that it plays a key role in connecting species that would not be connected otherwise even if it does not interact with them directly. A low  $C_D$  and a high  $C_C$  means that the species has a key role by interacting with important species. Because the absolute values of centrality vary with network

size and connectance, Freeman et al. (1979) suggest that the *centralization* measure, rarely applied in ecology, be used when comparing centrality across networks. Centralization is defined, for any centrality measure  $C_x$ , as the sum of the differences between each node's centrality, and the highest centrality value ( $\sum_i(C_x(i) - \max(C_x))$ ). This measure is then divided by the maximal possible value of centralization for a network with the same number of nodes and edges, which in turns depends on the formulae used to measure centrality, and can be estimated based on random draws of the networks.

### 2.3.2 *Species functional roles*

Species functional roles can be reflected in the interactions they establish. The usual approach in functional ecology is to look at species traits (Violle et al. 2007); they do in part influence the network position of species, either by mediating interactions (Brose et al. 2006a; Alexander et al. 2013), or by preventing them altogether (Olesen et al. 2011). For instance, Petchey et al. (2008a) used allometric scaling of body size and foraging behavior of individual consumers to predict species interaction. When multiple traits are studied, it is possible to build a dendrogram based on these traits and choose an arbitrary threshold on which to “cut” the tree. The species are then grouped at the base of the dendrograms in several groups (Petchey & Gaston 2002). This method usually does not account directly for interactions between species (Petchey et al. 2008a) but is useful when studying a process for which the influential traits are known or to test the importance of a particular (set of) traits on a function. When grouping species according to their traits, the critical issue is to select a valid (set of) traits from which groups will be formed. The functional groups identified this way are then analysed in the light of the species position within the network. Note that one *can*, in this situation, adopt a very generous definition of what constitutes a trait: spatial grouping of species (Baskerville et al. 2011) for example, is one example in which examining interactions in the light of species *attributes* provides ecological insights.

Absent external information, the role of a species can be hinted at by its interactions: species with similar interactions are often grouped in *trophic species*; it is in fact a common misunderstanding that generative food web models (Williams & Martinez 2000; Cattin et al. 2004) predict *species* interaction, where they actually predict interactions between *trophic groups*. The groups formed using this method will exhibit a high homogeneity in functional role but are likely to miss some species that do not interact with the same partners despite fulfilling the same functions at a different place in the network. Dalla Riva & Stouffer (2015) suggested an alternative to this approach: species positions are analyzed *before* clustering them into groups, allowing investigation of species interactions *and* avoiding obfuscation of the variance within groups.

Coux et al. (2016) suggested to use interactions to measure the functional role of species, by applying *FD* (“Functional Diversity”; Laliberté & Legendre 2010) to the adjacency or incidence matrix of the network. Under this framework, like in Mouillot et al. (2013), the uniqueness of a species is hinted at by its distance to the centroid of all other species. We argue that this approach should be questioned for two reasons. First, it is sensitive to the ordination choices made. Second, it is not clear how it allows the comparison of results across different networks: not only does the position of a species vary in relation to other species in the network, it varies from one network to another. Note that centrality measures are not necessarily better at identifying which species are unique: as we show in fig. 4, for some measures, non-unique nodes have high centrality values. We argue that the development of measures for node uniqueness should received increased attention. In particular, measures that rely on ordination only account for first-order interactions, *i.e.* the

direct interactions between species. As a consequence, a large part of the network structure, which emerges through consideration of longer chains of interactions, is not accessible via these methods.

Looking at network motifs is a promising way to address species functional roles and node uniqueness. Motifs are all the possible ways a fixed number of species (usually three or four) can interact. Within these motifs, species can occupy a variety of unique positions; for example, within a linear food chain, there are three distinct positions (bottom, middle, top), whereas a trophic loop has a single unique position. Within motifs with three species, 30 unique positions can be identified (Stouffer et al. 2012), and for each species, its frequency of appearance at each of these position within networks has been shown to be an inherent characteristic conserved through its evolutionary history. This method has the advantage of grouping species that may be different in terms of guild or partners, but that contribute in the same way to the structure of the community. Based on this vector it is possible to statistically identify species that exhibit similar profiles. Motif positions tend to be well conserved both in time (Stouffer et al. 2012) and space (Baker et al. 2014), making them ideal candidates to be investigated alongside functional traits and phylogenetic history.

### 2.3.3 Partition based on modularity

In large communities, some species are organized in modules (see “What do communities look like” part “Edges repartition within the graph”), within which they interact more frequently among themselves than with species of the same overall network but outside of their module. Guimerà & Nunes Amaral (2005) proposed that when functional or topological modules can be found in large networks, the functional role of a species can be defined by how its interactions are distributed within its module and with other modules. To identify these roles, the first step is to identify the functional modules of a large networks (see “What do communities look like” part “Edges repartition within the network”). The profile of species interactions is determined by using two measures.

First, the  $z$ -score quantifies how well-connected a species  $i$  is within its module  $m$ .

$$z_i = \frac{K_i - \bar{K}_{m_i}}{\sigma_{K_{m_i}}}, \quad (8)$$

where  $K_i$  is the degree of  $i$  within its module  $m_i$ ;  $\bar{K}_{m_i}$  is the average of  $K$  over all species of  $m_i$  and  $\sigma_{K_{m_i}}$  is the standard deviation of  $K$  in  $m_i$ .

Second, the *participation coefficient* (PC) describes the profile of  $i$ 's interaction with species found outside of the module  $m$ .

$$PC_i = \sum_{m=1}^{N_M} \left( \frac{K_{is}}{k_i} \right)^2, \quad (9)$$

where  $k_i$  is the total degree of species  $i$ , meaning a count of all its connection, inter- and intra module. The  $PC$  of a species therefore varies between 0 (all edges are within the module) and 1

(all interactions are uniformly distributed among all the modules). The use of these indices is based on the assumption that species with similar interactions have similar traits and so are expected to play the same functional role.

Olesen et al. (2007) use these two values to divide species in four groups, based on a cutoff for  $z$  (2.5) and for  $PC$  (0.62). Species with low  $z$  and low  $PC$  are “peripherals” – they are not well connected within or between modules. Species with low  $z$  and high  $PC$  connect well between, but not within, modules, and are “connectors”. Species with high  $z$  and low  $PC$  are “module hubs”, well connected within their own modules but not with the outside. Finally, species with high  $z$  and high  $PC$  are “network hubs”, connecting the entire community. In their analysis of plants and pollinators, Olesen et al. (2007) reveal that pollinators tend not to be module hubs, and are also less frequently network hubs than plants are.

#### 2.3.4 Contribution to network properties.

As species make differential contributions to network structure and processes, the removal of certain species will therefore have a greater effect on the community’s stability and functioning, and these species are therefore stronger contributors to these processes. Differential contribution to several processes can be estimated in multiple ways: by performing removal/addition experiments in real ecological systems (e.g. Cedar creek or BIODDEPTH experiments), by analyzing the effect of a species extinction within empirical (Estrada & Bodin 2008) or simulated (Berlow et al. 2009) systems, by using a modeling approach and simulating extinctions (Memmott et al. 2007), or by analyzing the statistical correlation between an ecosystem property and species functional roles (Thompson et al. 2012). Another way to quantify the contribution of a species to a property  $P$  is to compare it to its contribution to the same property when its interactions are randomized. This method allows studying the contribution of a species’ interactions, as the variation of interactions is intuitively expected to be faster than the variation of species. Indeed, because interactions require species to co-occur, because there are far more interactions than species, and because interactions have a dynamic of their own, whether there will be more signal in interactions than in species presence is an hypothesis that should be tested on empirical systems in priority.

The contribution of a species to a given network measure after its interactions are randomized is

$$c_i = \frac{(P - \langle P_i^* \rangle)}{\sigma_{P_i^*}}, \quad (10)$$

where  $P$  is the property (nestedness, modularity, productivity ...),  $\langle P_i^* \rangle$  and  $\sigma_{P_i^*}$  are the average and standard deviation of the property across a set of random replicates for which species  $i$  interactions have been randomized. The effects of several traits or structural properties of species (such as centrality or STR) on their contributions to given measure can then be analyzed.

#### 2.4 How are species related?

Some species exhibit a much larger set of interactions than others or form denser clusters within the network. One of the many challenges of ecology is to understand the causes and consequences

of such heterogeneous species interactions. Species are, first and foremost, related by their phylogenetic history. We will not address this aspect here, in no small part because it does not easily integrate with network theory. We encourage readers to refer to Cadotte & Davies (2016) instead.

One way in which the heterogeneity of species interactions is known is through analysis of the overlap in their partners, known as ecological similarity. For simplicity, we will use the vocabulary derived from trophic networks, but these methods can be applied to other types of ecological networks. Ecological similarity between species is a widely used concept that quantifies the resemblance between two species or “biotic interaction milieu” (McGill et al. 2006) and allows analyzing processes ranging from species niche (Elton 1927) and community assembly (Piechnik et al. 2008; Morlon et al. 2014) to trophic diversity (Petchey & Gaston 2002). The simplest and most widely used measure of pairwise ecological similarity is the Jaccard coefficient (Legendre & Legendre 2012):

$$S_j = \frac{a}{a + b + c} \quad (11)$$

where  $a$  is the number of shared partners,  $b$  the number of species that interact with only the first species and  $c$  with only the second species (for variations, see (Legendre & Legendre 2012)). The Jaccard similarity coefficient is widely used to estimate ecological similarity and competition between species (Rezende et al. 2009) but does not account for the shared absence of interactions (but see Chao et al. 2005). This is not a severe issue, as ecological networks tend to be extremely sparse, and therefore shared absence of interactions may not be informative. The similarity index has to be chosen with care depending on the focus of the study. In the general equation above, consumers and resources are seen as perfectly equivalent (additively), but, in directed networks, it can be adapted to include consumer and resources as different dimensions of trophic activities and/or for dynamical food webs by including information about flows (Yodzis & Innes 1992). Once a similarity matrix is formed from all pairwise measurements, a hierarchical clustering can be performed to build a dendrogram, which gives information about the trophic diversity of species within a community and the relative uniqueness of species (but see Petchey et al. 2008b). Cophenetic correlation (Sokal & Rohlf 1962) can then be used to analyze how well several dendrograms, built using different methods, preserve the similarity between species (Yodzis & Winemiller 1999). The similarity of overall communities can also be estimated to see how similar, or dissimilar, species within it are when compared to null models (Morlon et al. 2014). For this purpose, the mean or maximum pairwise similarity is averaged across the whole network under consideration.

## 2.5 *Is any of this significant?*

Most network properties tend to be collinear, specifically because they covary with connectance. For example, the number of interactions in a network with a known number of species will limit the possible values of nestedness, modularity, and so on (Poisot & Gravel 2014). A variety of approaches can be used to determine whether an observation represents a departure from a specified random expectation.

### 2.5.1 Null hypothesis significance testing

A large number of studies use the null hypothesis significance testing (NHST) paradigm, whether or not it is the most appropriate method. NHST works by generating *randomized* networks under a variety of constraints, measuring the property of interest on these randomizations, then commonly using a one-sample *t*-test with the value of the empirical measure as its reference. This is justified because, through the mean value theorem, the application of enough randomizations should yield a normal distribution of the simulated network measure (see Flores et al. 2011). There are also a number of ways to generate randomized adjacency matrices. Bascompte et al. (2003) used a probabilistic sampling approach, where the probability of drawing an interaction depends on the relative degree of the species; Fortuna & Bascompte (2006) used the same approach, with the distinction that all interactions have the same probability (equal to connectance). Drawing from a probability distribution in this manner has a number of shortcomings, notably the fact that some species can end up having no interactions, thus changing the network size. An alternate approach is to use constrained permutations, where pairs of interactions are swapped to keep some quantity (the overall number of interactions, the degree of all species, and so on) constant. This approach is used in null models for species occupancy (Gotelli 2000; Gotelli & Entsminger 2003; Ulrich & Gotelli 2007). Stouffer et al. (2007) used an intermediate approach, where swapping was done as part as a “simulated annealing routine”, to give the algorithm enough leeway to explore non-optimal solutions before converging (as opposed to just swapping, which has no definition of the optimality of a solution).

### 2.5.2 Hypotheses underpinning null models

The specification of a null model embodies the hypothesis that is tested. In the context of bipartite networks (unipartite networks such as food webs have received comparatively less attention), there are three broad families of models. Type I (Fortuna & Bascompte 2006) are focused on *connectance*, and the probability of any two species *i* and *j* interacting is fixed as

$$P_{i \rightarrow j} = \frac{|E|}{|T| \times |B|}, \quad (12)$$

where *T* and *B* are vertices from the “top” ( $T = \{v \in V, k_{\text{in}}(v) = 0\}$ ) and “bottom” ( $B = \{v \in V, k_{\text{out}}(v) = 0\}$ ) levels of the network (these methods were originally applied to bipartite networks). This model assumes that interactions are distributed at random between all species, without considering the degree of the species. Deviation from the predictions of this model indicate that the network measure of interest cannot be predicted by connectance alone.

Type II (Bascompte et al. 2003) adds an additional level of constraint, in that it respects the degree distribution of the network (in degree  $k_{\text{in}}$ ; out-degree  $k_{\text{out}}$ ). In a Type II network,

$$P_{i \rightarrow j} = \frac{1}{2} \left( \frac{k_{\text{in}}(j)}{|T|} + \frac{k_{\text{out}}(i)}{|B|} \right), \quad (13)$$

meaning that the interaction is assigned under the hypothesis that *i* distributes its outgoing edges at random, and *j* receives its incoming edges at random as well. In this model, species with more

interactions have a higher probability of receiving interactions in the simulated network. This respects both the distribution of generality and vulnerability. Deviation from the predictions of this model indicate that the network measure of interest cannot be predicted by the degree distribution alone.

Finally, Type III models account for only one side of the degree distribution, and can be defined as Type III in, wherein

$$P_{i \rightarrow j} = \frac{k_{\text{in}}(j)}{|T|}, \quad (14)$$

and Type III out, wherein

$$P_{i \rightarrow j} = \frac{k_{\text{out}}(i)}{|B|}. \quad (15)$$

### 2.5.3 Topological and generative models

It is important to note that these models, based on permutations, are purely *topological*. There is no difference, when deciding if an interaction should be assigned between two species, between *e.g.* a plant-pollinator network, or a host-parasite network. To inject some processes in the null models used, several “generative” models have been proposed. By contrast to topological models, generative models use core assumptions about ecological mechanisms to generate networks that mimic aspects of a template network. Arguably the most influential (despite it being limited to trophic interactions) is the “niche model” (Williams & Martinez 2000), that generates networks of trophic groups based on the hypothesis that feeding interactions are determined by an arbitrary niche-forming axis generally accepted or implied to be body-size ratios (Brose et al. 2006a). Gravel et al. (2013) showed that the parameters of this model can be derived from empirical observations. The niche model assumes a beta distribution of fundamental niche breadth in the entire network; this assumption, close though it may be to empirical data, nevertheless has no mechanistic or theoretical support behind it. This suggests that so-called generative models may or may not be adequately grounded in ecological mechanisms, which implies the need for additional developments. Similar models include the cascade model and the nested-hierarchy model, but these tend to generate networks that are qualitatively similar to those of the niche model (Brose et al. 2006b). More recently, several models suggested that species traits can be used to approximate the structure of networks (Santamaría & Rodríguez-Gironés 2007; Bartomeus 2013; Crea et al. 2015; Olito & Fox 2015; Bartomeus et al. 2016). Finally, networks tend to be well described only by the structure of species abundances. Both in food webs (Canard et al. 2012) and host-parasite bipartite networks (Canard et al. 2014), modelling the probability of an interaction as the product of relative abundance is sufficient to generate realistic networks. These generative models represent an invaluable tool, in that they allow building on mechanisms (though, as we illustrate with the niche model, not necessarily ecological ones) instead of observed relationships to generate the random expectations.



## 2.6 Future methods for novel questions

Surveying the methodological toolkit available to analyze ecological networks highlights areas in which future developments are needed. We identified, in particular, four topics that would require additional attention.

### 2.6.1 Multi/hyper graphs

Most of the tools to analyse species interaction networks are limited to node-to-node interactions, to the exclusion of node-to-interaction or interaction-to-interaction interactions. This limits the variety of biological situations that can be represented. Golubski & Abrams (2011) presented a number of situations that elude description in this way. For example, opportunistic infection by a pathogen  $O$  requires the pre-existence of an interaction between a pathogen  $P$  and an host  $H$ . This situation is better captured as (i) the existence of an interaction between  $H$  and  $P$  (noted  $L_{HP}$ ) and (ii) the existence of an interaction between  $O$  and this interaction, noted  $O \rightarrow L_{HP}$ . Another hard-to-represent scenario is niche pre-emption: if a host  $H$  can be infected by either pathogen  $P_1$  or  $P_2$ , but not both at the same time, then the interactions  $L_{HP_1}$  and  $L_{HP_2}$  interact antagonistically. This is a different situation from simple competition between  $P_1$  and  $P_2$ . Although these are extremely important drivers of, for example, species distributions (Araújo & Rozenfeld 2014; Blois et al. 2014), the current methodological framework of ecological network analysis is not well prepared to represent these data.

### 2.6.2 External information

Building on the basis suggested by Poisot et al. (2015), Bartomeus et al. (2016) proposed that the mechanisms determining ecological interactions can be identified within a cohesive statistical framework, regardless of the type of ecological interaction. At its core, their framework assumes that interactions are the consequence of *matching rules*, i.e. relationships between traits values and distributions. For example, a pollinator can get access to nectar if its proboscis is of a length compatible with the depth of the flower. Rather than relying on natural history, these “linkage rules” (Bartomeus 2013) can be uncovered statistically, by modelling an interaction  $L_{ij}$  as a function  $f(x_i, y_j)$  of the traits involved, wherein  $x_i$  and  $y_j$  are sets of traits for species  $i$  and  $j$  respectively. Procedures akin to variable selection will identify the traits involved in the interaction, and model selection can identify the shape of the relationship between trait values and interactions. There are two reasons for which this work is an important milestone in the modern analysis of ecological networks. First, it places interactions within the context of community ecology, by showing how they build upon, and influence, trait distributions. In particular, it draws attention to how structure of networks results both from the linkage rules and from the distribution of traits in the locality where the network is measured (Gravel et al. 2016a). Second, it does away with the necessity of topological models to generate random networks: identifying matching rules is the only step needed to generate random networks based on *functional, biological* hypotheses, thereby solving some of the concerns we identified with generative null models. We argue that this approach should be expanded to accommodate, e.g. phylogenetic relationships between species. The ideal framework to study networks, and the one we should strive for, avoids considering interactions in isolation from other aspects of community structure – instead, it is explicit about

the fact that none of these aspects are independent. Although this will come with additional mathematical and statistical complexity, this cost will be more than offset by the quality and the refinement of the predictions we will make.

Although documenting species, traits, and interactions seems like a daunting effort, there are novel approaches to accelerate the generation of data in some systems. For example, Bahlai & Landis (2016) show that passive measurement based on citizen science (using Google Images) allows users to accurately document phenological matches and species interactions between flowers and bumblebees. Similarly, Evans et al. (2016) show that sequencing of diet gives access to phylogenetic and interaction history within a single experiment. Addressing novel questions will require a diversification of the methodological toolkit of network ecologists, as well as an improved dialog between empiricists and theoreticians.

### 2.6.3 *Networks of networks*

An additional frontier for methodological development has to do with the fact that networks can be nested. A network of species–species interactions is the addition of interactions at the population level (Poisot et al. 2015), themselves being aggregates of interactions at the individual level (Dupont et al. 2011, 2014; Melián et al. 2014). This is also true when moving from single-site to multi-site network analysis (Poisot et al. 2012; Canard et al. 2014; Carstensen et al. 2014; Trøjelsgaard et al. 2015). Local interaction networks exist in meta-community landscape (Gravel et al. 2011; Trøjelsgaard & Olesen 2016), and their structure both locally and globally, is constrained by, but is also a constraint on, co-occurrence (Araújo et al. 2011; Cazelles et al. 2015).

Analyzing networks in a meta-community context might require a new representation. Most of the challenge comes from two sources. First, species are shared across locations; this means that two nodes in two networks may actually represent the same species. Second, networks are connected by species movement. Both the dynamics and the structure of networks are impacted by the fact that species move across the landscape at different rates and in different ways. The implication is that every species in the landscape potentially experiences its own version of the metacommunity (Olesen et al. 2010). These issues have seldom been addressed, but would allow a more potent examination of the spatial structure and dynamics of ecological networks (Trøjelsgaard & Olesen 2016). Gravel et al. (2016b) recently introduced spatially explicit Jacobian matrices, allowing the formal consideration of coupled dynamics of several networks in a meta-community.

## 3 WHAT ARE SPECIES INTERACTIONS NETWORKS, REVISITED?

The above analyses benefit from access to (context-enhanced) data on ecological interactions. An important point to raise is that the format expected for the analysis (*i.e.* when data are actively being processed) is different from the format suitable for storage, archival, mining, and linking. From an information management perspective, this puts the question of *What are ecological networks?* in a new light.

**Table 1** Comparison of software packages. A + indicates that the feature exists. A question mark indicates that it is possible to implement a feature, but it is not built-in. In addition to their language of choice, these packages differ in the license they use. GPL, notably, can be more difficult to use in governments / industrial settings. Functionalities marked with a  $\approx$  indicate that they are either not fully supported, or not working out of the box. Note that `igraph` has both R and Python interfaces. `EcologicalNetwork` is the only package to support probabilistic networks, and `BiMat` is the only one to support multi-scale network analysis.

| Name                           | ref                    | Lang.  | Lic. | Unip. | Bipart. | Quant.    | NHST      |
|--------------------------------|------------------------|--------|------|-------|---------|-----------|-----------|
| <code>EcologicalNetwork</code> | Poisot et al. (2016b)  | Julia  | MIT  | +     | +       | +         | +         |
| <code>LightGraphs</code>       |                        | Julia  | BSD2 | +     | +       |           | $\approx$ |
| <code>networkx</code>          | Hagberg et al. (2008)  | Python | BSD3 | +     | +       | +         | $\approx$ |
| <code>igraph</code>            | Csardi & Nepusz (2006) | C      | GPL  | +     | +       |           | $\approx$ |
| <code>bipartite</code>         | Dormann et al. (2008)  | R      | GPL  |       | +       | +         | +         |
| <code>BiMat</code>             | Flores et al. (2016)   | Octave | BSD2 |       | +       |           | +         |
| <code>cheddar</code>           | Hudson et al. (2013)   | R      | BSD2 | +     |         | $\approx$ |           |

Most of the measures mentioned above, and therefore most software, expect networks to be represented as matrices; every row/column of the matrix is an object, and the value at row  $i$  and column  $j$  is a measure of the interaction between  $i$  and  $j$ . It can be a Boolean value, a measure of interaction strength, or a probability of interaction. This approach is used by databases such as IWDB, Web-of-Life.es, and World of Webs (Thompson et al. 2012). Although this approach has the benefit of being immediately useful, it lacks the easy addition of metadata. In the context of species interaction networks, metadata is *required* at several levels: nodes (species, individuals), interactions, but also the overall network itself (date of collection, site environmental data, and so on). Most research has so far been *constrained* to the adjacency matrix representation of networks. However, ontologically richer representations (graphs with built-in metadata) may offer themselves to a larger and different tool set: multi-graphs, and hyper-graphs, capture a wider picture of ecosystems where all types of interactions are considered simultaneously. Food webs, or other networks, stored as binary or weighted matrices may not be the most relevant representation for these questions.

There are two initiatives that remedy this shortcoming by providing meta-data-rich information on ecological interactions. `globi` (Poelen et al. 2014) is a database of interactions, extracted from the literature, and available through `GBIF`. It relies on an ontology of interaction types, and on unique taxonomic identifiers for species. `mangal.io` (Poisot et al. 2016a) is a database of networks, that can be fed and queried openly through several packages; it relies on a custom data format, and can be linked to other databases through the use of taxonomic identifiers.

Networks formatted as raw matrices may well be immediately usable, but supplementing them with external information is hard. On the other hand, granular databases with rich metadata can always be converted to raw matrices, while retaining additional information. It is important that we maintain a distinction between the formats used for *storage* (in which case, relational databases are the clear winner) from the formats used for *analysis* (that can be generated from queries of databases). In order to facilitate synthesis, and draw on existing data sources, it seems important that the practice of depositing interaction matrices be retired, in the profit of contributing to the growth of context-rich databases. In table 1, we provide an overview of the main software packages available for the analysis of ecological networks.

## 4 CONCLUSIONS

In this contribution, we have attempted a summary of the measures from graph theory that are the most frequently used in, or the most relevant for, the analysis of species interaction networks. Even though species interaction networks are ubiquitous in community ecology, biogeography, macroecology, and so on, there is no clear consensus on how to analyse them. We identified a number of areas that would benefit from more methodological development.

First, there is a pressing need to accommodate hypergraphs and multigraphs within our framework, so as to work on a larger variety of ecological situations. Pilosof et al. (2015) identified these systems as having a high relevance when predicting community change, and the emergence of zoonotic diseases, and this is a clear example of an area in which ecology and applied mathematics can have a fruitful interaction.

Second, the information we use on networks needs to be expanded. Far from being a collection of species and their interactions, networks are structured by environmental forces, species trait distribution, species phylogeny, and random chance. Replicated datasets with extensive metadata and additional information would most likely boost our power to describe, explain, and predict network structure (Poisot et al. 2016d).

Third (and this ties in to the previous point), we need to establish stronger standards for the manipulation of network data. The usual representation of “networks as matrices” is not powerful enough to perform the sort of analyses hinted at in this contribution. Networks are difficult to manipulate, and the lack of a robust software suite to analyse them is a very worrying trend – our knowledge of ecological networks is only as good as our implementation of the analyses, and academic code is not known for its high quality or robustness.

Finally, there is a need to compare the alternative measures of a single property. We tried as much as possible to frame these measures in the context of their ecological meaning. But this can only properly be done by strengthening the ties between network analysis and field or lab based community ecology.

**Acknowledgements:** ED, MB, and TP contributed equally to this manuscript. Order of authors MB and ED was decided by flipping a coin. All authors besides MB, ED, MHB, GVDR and TP listed in alphabetic order. MB, ED, MHB, and TP wrote the article outline. ED and MB wrote the first draft. ED, MB, and TP revised the manuscript. All other authors contributed to edits and discussion. This work was conducted as a part of the Ecological Network Dynamics Working Group at the National Institute for Mathematical and Biological Synthesis, sponsored by the National Science Foundation through NSF Award #DBI-1300426, with additional support from The University of Tennessee, Knoxville.

## REFERENCES

- Albert & Barabási. (2002). Statistical mechanics of complex networks. *Rev Mod Phys.* 74.
- Alexander et al. (2013). Trait-mediated indirect interactions in a marine intertidal system as

quantified by functional responses. *Oikos*. 122:1521–31.

**Allesina & Pascual.** (2007). Network structure, predator–prey modules, and stability in large food webs. *Theoretical Ecology*. 1:55–64.

**Allesina & Pascual.** (2009). Googling Food Webs: Can an Eigenvector Measure Species' Importance for Coextinctions? *PLoS Comput Biol*. 5:e1000494.

**Almeida-Neto et al.** (2007). On nestedness analyses: rethinking matrix temperature and anti-nestedness. *Oikos*. 116:716–22.

**Araújo & Rozenfeld.** (2014). The geographic scaling of biotic interactions. *Ecography*. 37:406–15.

**Araújo et al.** (2008). Network analysis reveals contrasting effects of intraspecific competition on individual vs. population diets. *Ecology*. 89:1981–93.

**Araújo et al.** (2011). Using species co-occurrence networks to assess the impacts of climate change. *Ecography*. 34:897–908.

**Bahlai & Landis.** (2016). Predicting plant attractiveness to pollinators with passive crowdsourcing. *Royal Society Open Science*. 3:150677.

**Baiser et al.** (2011). Geographic variation in network structure of a nearctic aquatic food web. *Global Ecology and Biogeography*. 21:579–91.

**Baker et al.** (2014). Species' roles in food webs show fidelity across a highly variable oak forest. *Ecography*. 38:130–9.

**Banašek-Richter et al.** (2004). Sampling effects and the robustness of quantitative and qualitative food-web descriptors. *J Theor Biol*. 226:23–32.

**Bartomeus.** (2013). Understanding Linkage Rules in Plant-Pollinator Networks by Using Hierarchical Models That Incorporate Pollinator Detectability and Plant Traits. *PLoS ONE*. 8:e69200.

**Bartomeus et al.** (2016). A common framework for identifying linkage rules across different types of interactions. *Funct Ecol*. 30:1894–903.

**Bascompte & Melián.** (2005). Simple trophic modules for complex food webs. *Ecology*. 86:2868–73.

**Bascompte et al.** (2003). The nested assembly of plant-animal mutualistic networks. *Proceedings of the National Academy of Sciences*. 100:9383–7.

**Baskerville et al.** (2011). Spatial Guilds in the Serengeti Food Web Revealed by a Bayesian Group Model. *PLoS Comput Biol*. 7:e1002321.

**Bastolla et al.** (2009). The architecture of mutualistic networks minimizes competition and

increases biodiversity. *Nature*. 458:1018–20.

**Bell et al.** (1999). Centrality measures for disease transmission networks. *Social Networks*. 21:1–21.

**Berlow et al.** (2009). Simple prediction of interaction strengths in complex food webs. *PNAS*. 106:187–91.

**Bersier et al.** (2002). Quantitative descriptors of food-web matrices. *Ecology*. 83:2394–407.

**Blois et al.** (2014). A framework for evaluating the influence of climate, dispersal limitation, and biotic interactions using fossil pollen associations across the late Quaternary. *Ecography*. 37:1095–108.

**Blondel et al.** (2008). Fast unfolding of communities in large networks. *J Stat Mech Theory Exp*. 2008:P10008.

**Blüthgen et al.** (2008). What do interaction network metrics tell us about specialization and biological traits? *Ecology*. 89:3387–99.

**Bonacich.** (1987). Power and Centrality: A Family of Measures. *American Journal of Sociology*. 92:1170–82.

**Borrelli.** (2015). Selection against instability: stable subgraphs are most frequent in empirical food webs. *Oikos*. 124:1583–8.

**Borrett et al.** (2014). The rise of Network Ecology: Maps of the topic diversity and scientific collaboration. *Ecological Modelling*. 293:111–27.

**Brose et al.** (2006a). Consumer-resource body-size relationships in natural food webs. *Ecology*. 87:2411–7.

**Brose et al.** (2004). Unified spatial scaling of species and their trophic interactions. *Nature*. 428:167–71.

**Brose et al.** (2006b). Allometric scaling enhances stability in complex food webs. *Ecol Lett*. 9:1228–36.

**Cadotte & Davies.** (2016). Phylogenies in ecology: a guide to concepts and methods. Princeton: Princeton University Press;

**Caldarelli.** (2007). Scale-free networks: complex webs in nature and technology. *OUP Cat*.

**Camacho et al.** (2007). Quantitative analysis of the local structure of food webs. *Journal of Theoretical Biology*. 246:260–8.

**Camerano.** (1880). Dell'equilibrio dei viventi merce la reciproca distruzione. *Atti Della R Accad Delle Sci Torino*. 15:393–414.

**Canard et al.** (2012). Emergence of Structural Patterns in Neutral Trophic Networks. *PLoS ONE*.

7:e38295.

**Canard et al.** (2014). Empirical evaluation of neutral interactions in host-parasite networks. *The American Naturalist*. 183:468–79.

**Carscallen et al.** (2012). Estimating trophic position in marine and estuarine food webs. *Ecosphere*. 3:art25.

**Carstensen et al.** (2014). Beta Diversity of Plant-Pollinator Networks and the Spatial Turnover of Pairwise Interactions. *PLoS ONE*. 9:e112903.

**Cattin et al.** (2004). Phylogenetic constraints and adaptation explain food-web structure. *Nature*. 427:835–9.

**Cazelles et al.** (2015). A theory for species co-occurrence in interaction networks. *Theoretical Ecology*. 9:39–48.

**Chacoff et al.** (2012). Evaluating sampling completeness in a desert plant-pollinator network. *J Anim Ecol*. 81:190–200.

**Chadès et al.** (2011). General rules for managing and surveying networks of pests, diseases, and endangered species. *PNAS*. 108:8323–8.

**Chagnon.** (2015). Characterizing topology of ecological networks along gradients: The limits of metrics' standardization. *Ecological Complexity*. 22:36–9.

**Chao et al.** (2005). A new statistical approach for assessing similarity of species composition with incidence and abundance data. *Ecology Letters*. 8:148–59.

**Chesson & Kuang.** (2008). The interaction between predation and competition. *Nature*. 456:235–8.

**Cohen & Briand.** (1984). Trophic links of community food webs. *Proc Natl Acad Sci U S A*. 81:4105–9.

**Coux et al.** (2016). Linking species functional roles to their network roles. *Ecology Letters*. 19:762–70.

**Crea et al.** (2015). A new model for ecological networks using species-level traits. *Methods Ecol Evol*. 7:232–41.

**Csardi & Nepusz.** (2006). The igraph Software Package for Complex Network Research. *Inter-Journal. Complex Systems*:1695.

**Dale & Fortin.** (2010). From Graphs to Spatial Graphs. *Annu Rev Ecol Evol Syst*. 41:21–38.

**Dalla Riva & Stouffer.** (2015). Exploring the evolutionary signature of food webs' backbones using functional traits. *Oikos*. 125:446–56.

**Dalsgaard et al.** (2013). Historical climate-change influences modularity and nestedness of

pollination networks. *Ecography*. 36:1331–40.

**Devictor et al.** (2010). Defining and measuring ecological specialization. *Journal of Applied Ecology*. 47:15–25.

**Dormann et al.** (2008). Introducing the bipartite Package: Analysing Ecological Networks. *R News*. 8:8–11.

**Dunne.** (2006). The Network Structure of Food Webs. In: Dunne, Pascual, eds. *Ecological networks: Linking structure and dynamics*. Oxford University Press; pp. 27–86.

**Dunne et al.** (2002a). Food-web structure and network theory: the role of connectance and size. *Proc Natl Acad Sci U S A*. 99:12917.

**Dunne et al.** (2002b). Network structure and biodiversity loss in food webs: robustness increases with connectance. *Ecol Lett*. 5:558–67.

**Dupont et al.** (2009). Spatio-temporal variation in the structure of pollination networks. *Oikos*. 118:1261–9.

**Dupont et al.** (2011). Scaling down from species to individuals: a flower–visitation network between individual honeybees and thistle plants. *Oikos*. 120:170–7.

**Dupont et al.** (2014). Spatial structure of an individual-based plant–pollinator network. *Oikos*. 123:1301–10.

**Earn.** (2000). Coherence and Conservation. *Science*. 290:1360–4.

**Egerton.** (2002). A History of the Ecological Sciences, Part 6: Arabic Language Science: Origins and Zoological Writings. *Bulletin of the Ecological Society of America*. 83.

**Eklöf & Stouffer.** (2016). The phylogenetic component of food web structure and intervality. *Theor Ecol*. 9:107–15.

**Eklöf et al.** (2013). The dimensionality of ecological networks. *Ecol Lett*. 16:577–83.

**Elton.** (1927). *Animal ecology*. University of Chicago Press;

**Estrada & Bodin.** (2008). USING NETWORK CENTRALITY MEASURES TO MANAGE LANDSCAPE CONNECTIVITY. *Ecological Applications*. 18:1810–25.

**Evans et al.** (2016). Merging DNA metabarcoding and ecological network analysis to understand and build resilient terrestrial ecosystems. *Functional Ecology*.

**Faust & Skvoretz.** (2002). Comparing Networks Across Space and Time, Size and Species. *Sociol Methodol*. 32:267–99.

**Flores et al.** (2011). Statistical structure of host–phage interactions. *Proc Natl Acad Sci U S A*. 108:E288–297.

**Flores et al.** (2016). BiMAT: a MATLAB package to facilitate the analysis and visualization of



bipartite networks. *Methods in Ecology and Evolution*. 7:127–32.

**Flores et al.** (2013). Multi-scale structure and geographic drivers of cross-infection within marine bacteria and phages. *ISME J.* 7:520–32.

**Fontaine et al.** (2011). The ecological and evolutionary implications of merging different types of networks. *Ecol Lett.* 14:1170–81.

**Fortuna & Bascompte.** (2006). Habitat loss and the structure of plant-animal mutualistic networks. *Ecol Lett.* 9:281–6.

**Fortuna et al.** (2010). Nestedness versus modularity in ecological networks: two sides of the same coin? *Journal of Animal Ecology*. 78:811–7.

**Freeman.** (1977). A Set of Measures of Centrality Based on Betweenness. *Sociometry*. 40:35.

**Freeman.** (1978). Centrality in social networks conceptual clarification. *Social Networks*. 1:215–39.

**Freeman et al.** (1979). Centrality in social networks: ii. experimental results. *Social Networks*. 2:119–41.

**Golubski & Abrams.** (2011). Modifying modifiers: what happens when interspecific interactions interact? *Journal of Animal Ecology*. 80:1097–108.

**Gotelli.** (2000). Null model analysis of species co-occurrence patterns. *Ecology*. 81:2606–21.

**Gotelli & Entsminger.** (2003). Swap Algorithms in Null Model Analysis. *Ecology*. 84:532–5.

**Gravel et al.** (2016a). The meaning of functional trait composition of food webs for ecosystem functioning. *Phil Trans R Soc B*. 371:20150268.

**Gravel et al.** (2016b). Stability and complexity in model meta-ecosystems. *Nature Communications*. 7:12457.

**Gravel et al.** (2011). Trophic theory of island biogeography. *Ecology Letters*. 14:1010–6.

**Gravel et al.** (2013). Inferring food web structure from predator-prey body size relationships. Freckleton, ed. *Methods in Ecology and Evolution*. 4:1083–90.

**Guimerà & Amaral.** (2005). Cartography of complex networks: modules and universal roles. *Journal of Statistical Mechanics: Theory and Experiment*. 2005:P02001.

**Guimerà & Nunes Amaral.** (2005). Functional cartography of complex metabolic networks. *Nature*. 433:895–900.

**Guimerà et al.** (2004). Modularity from fluctuations in random graphs and complex networks. *Physical Review E*. 70.

**Hagberg et al.** (2008). Exploring Network Structure, Dynamics, and Function using NetworkX. In: Varoquaux et al., eds. *Proceedings of the 7th Python in Science Conference*. Pasadena, CA USA;

pp. 11–5.

**Havens.** (1992). Scale and Structure in Natural Food Webs. *Science*. 257:1107–9.

**Holt.** (1996). Food webs in space: an island biogeographic perspective. *Food webs*. Springer; pp. 313–23.

**Holt.** (1997). Community modules. In: Gange, Brown, eds. *Multitrophic Interactions in Terrestrial Ecosystems*. Blackwell Science; pp. 333–49.

**Holt.** (2009). Bringing the Hutchinsonian niche into the 21st century: Ecological and evolutionary perspectives. *Proceedings of the National Academy of Sciences*. 106:19659–65.

**Hudson et al.** (2013). Cheddar: analysis and visualisation of ecological communities in R. *Methods Ecol Evol*. 4:99–104.

**Jordano & Bascompte.** (2013). *Mutualistic Networks* [Internet]. Princeton Univ Press;

**Jordano et al.** (2003). Invariant properties in coevolutionary networks of plant–animal interactions. *Ecology Letters*. 6:69–81.

**Jordán & Scheuring.** (2004). Network ecology: topological constraints on ecosystem dynamics. *Phys Life Rev*. 1:139–72.

**Katz.** (1953). A new status index derived from sociometric analysis. *Psychometrika*. 18:39–43.

**Kéfi et al.** (2012). More than a meal: integrating non-feeding interactions into food webs. *Ecol Lett*. 15:291–300.

**Kim.** (1993). The Competition Number and its Variants. In: John Gimbel, ed. *Annals of Discrete Mathematics*. Elsevier; pp. 313–26.

**Koleff et al.** (2003). Measuring beta diversity for presence–absence data. *Journal of Animal Ecology*. 72:367–82.

**Krasnov et al.** (2004). Geographical variation in host specificity of fleas (Siphonaptera) parasitic on small mammals: the influence of phylogeny and local environmental conditions. *Ecography*. 27:787–97.

**Krause et al.** (2003). Compartments revealed in food-web structure. *Nature*. 426:282–5.

**Laliberté & Legendre.** (2010). A distance-based framework for measuring functional diversity from multiple traits. *Ecology*. 91:299–305.

**Legendre & Legendre.** (2012). *Numerical ecology*. Third English edition. Oxford, UK: Elsevier;

**Lemos-Costa et al.** (2016). Network analyses support the role of prey preferences in shaping resource use patterns within five animal populations. *Oikos*. 125:492–501.

**Liu & Murata.** (2009). Community Detection in Large-Scale Bipartite Networks. *2009 IEEE/WIC/ACM International Joint Conference on Web Intelligence and Intelligent Agent Technology*. Institute of

Electrical & Electronics Engineers (IEEE);

**Martínez.** (1992). Constant Connectance in Community Food Webs. *The American Naturalist*. 139:1208–18.

**Martínez et al.** (1999). Effects of sampling effort on characterization of food-web structure. *Ecology*. 80:1044–55.

**Martín González et al.** (2010). Centrality measures and the importance of generalist species in pollination networks. *Ecological Complexity*. 7:36–43.

**McCann.** (2007). Protecting biostructure. *Nature*. 446:29–9.

**Mccann.** (2012). Food webs. Princeton: Princeton University Press;

**McCann et al.** (1998). Weak trophic interactions and the balance of nature. *Nature*. 395:794–8.

**McDonald-Madden et al.** (2016). Using food-web theory to conserve ecosystems. *Nature Communications*. 7:10245.

**McGill et al.** (2006). Rebuilding community ecology from functional traits. *Trends Ecol Evol*. 21:178–85.

**Melián et al.** (2014). Individual trait variation and diversity in food webs.

**Memmott et al.** (2007). Global warming and the disruption of plant-pollinator interactions. *Ecol Lett*. 10:710–7.

**Memmott et al.** (2004). Tolerance of pollination networks to species extinctions. *Proc Biol Sci*. 271:2605–11.

**Milo et al.** (2002). Network motifs: simple building blocks of complex networks. *Science*. 298:824–7.

**Minor et al.** (2008). Uncertainty in spatially explicit population models. *Biological Conservation*. 141:956–70.

**Monteiro & Faria.** (2016). The interplay between population stability and food-web topology predicts the occurrence of motifs in complex food-webs. *Journal of Theoretical Biology*. 409:165–71.

**Montoya et al.** (2006). Ecological networks and their fragility. *Nature*. 442:259–64.

**Morand et al.** (2002). Mammal density and patterns of ectoparasite species richness and abundance. *Oecologia*. 131:289–95.

**Morin.** (2011). Community Ecology [Internet]. Wiley-Blackwell;

**Morlon et al.** (2014). Effects of trophic similarity on community composition. *Ecol Lett*.:n/a–a.

**Mouillot et al.** (2013). A functional approach reveals community responses to disturbances.

*Trends Ecol Evol.* 28:167–77.

**Newman.** (2004). Fast algorithm for detecting community structure in networks. *Physical Review E.* 69.

**Newman.** (2010). Networks. An introduction [Internet]. New York, NY: Oxford University Press;

**Newman & Girvan.** (2004). Finding and evaluating community structure in networks. *Physical review E.* 69:026113.

**Novak et al.** (2016). Characterizing Species Interactions to Understand Press Perturbations: What Is the Community Matrix? *Annual Review of Ecology, Evolution, and Systematics.* 47:409–32.

**Olesen et al.** (2007). The modularity of pollination networks. *Proceedings of the National Academy of Sciences.* 104:19891–6.

**Olesen et al.** (2011). Missing and forbidden links in mutualistic networks. *Proc R Soc B.* 278:725–32.

**Olesen et al.** (2010). From Broadstone to Zackenbergl: space, time and hierarchies in ecological networks. *Advances in Ecological Research.* 42:1.

**Olito & Fox.** (2015). Species traits and abundances predict metrics of plantpollinator network structure, but not pairwise interactions. *Oikos.* 124:428–36.

**O'Donnell et al.** (2017). Spatial distribution of environmental DNA in a nearshore marine habitat. *PeerJ.* 5:e3044.

**Paine.** (1969). The Pisaster-Tegula Interaction: Prey Patches, Predator Food Preference, and Intertidal Community Structure. *Ecology.* 50:950–61.

**Petchey & Gaston.** (2002). Functional diversity (FD), species richness and community composition. *Ecol Lett.* 5:402–11.

**Petchey et al.** (2008a). Size, foraging, and food web structure. *Proceedings of the National Academy of Sciences.* 105:4191–6.

**Petchey et al.** (2008b). Trophically unique species are vulnerable to cascading extinction. *The American Naturalist.* 171:568–79.

**Piechnik et al.** (2008). Food-web assembly during a classic biogeographic study: species “trophic breadth” corresponds to colonization order. *Oikos.* 117:665–74.

**Pilosof et al.** (2015). The Multilayer Nature of Ecological Networks. *arXiv preprint arXiv:151104453.*

**Pimm & Lawton.** (1978). On feeding on more than one trophic level. *Nature.* 275:542–4.

**Pires et al.** (2015). Pleistocene megafaunal interaction networks became more vulnerable after human arrival. *Proceedings of the Royal Society B: Biological Sciences.* 282:20151367.

**Poelen et al.** (2014). Global biotic interactions: An open infrastructure to share and analyze

- species-interaction datasets. *Ecological Informatics*. 24:148–59.
- Poisot.** (2013). An a posteriori measure of network modularity. *F1000Research*. 2.
- Poisot & Gravel.** (2014). When is an ecological network complex? Connectance drives degree distribution and emerging network properties. *PeerJ*. 2:e251.
- Poisot et al.** (2016a). mangal - making ecological network analysis simple. *Ecography*. 39:384–90.
- Poisot et al.** (2012). The dissimilarity of species interaction networks. *Ecol Lett*. 15:1353–61.
- Poisot et al.** (2016b). The structure of probabilistic networks. Vamosi, ed. *Methods in Ecology and Evolution*. 7:303–12.
- Poisot et al.** (2016c). Synthetic datasets and community tools for the rapid testing of ecological hypotheses. *Ecography*. 39:402–8.
- Poisot et al.** (2015). Beyond species: why ecological interaction networks vary through space and time. *Oikos*. 124:243–51.
- Poisot et al.** (2016d). Describe, understand and predict: why do we need networks in ecology? *Funct Ecol*. 30:1878–82.
- Post.** (2002). The long and short of food-chain length. *Trends Ecol Evol*. 17:269–77.
- Poulin.** (2010). Network analysis shining light on parasite ecology and diversity. *Trends in Parasitology*. 26:492–8.
- Proulx et al.** (2005). Network thinking in ecology and evolution. *Trends in Ecology & Evolution*. 20:345–53.
- Przulj.** (2007). Biological network comparison using graphlet degree distribution. *Bioinformatics*. 23:e177–83.
- Rezende et al.** (2009). Compartments in a marine food web associated with phylogeny, body mass, and habitat structure. *Ecology Letters*. 12:779–88.
- Rodriguez-Girones & Santamaria.** (2006). A new algorithm to calculate the nestedness temperature of presence-absence matrices. *J Biogeogr*. 33:924–35.
- Roopnarine & Angielczyk.** (2012). The evolutionary palaeoecology of species and the tragedy of the commons. *Biology Letters*. 8:147–50.
- Sanfeliu & Fu.** (1983). A distance measure between attributed relational graphs for pattern recognition. *IEEE Transactions on Systems, Man, and Cybernetics*. SMC-13:353–62.
- Santamaría & Rodríguez-Gironés.** (2007). Linkage Rules for Plant–Pollinator Networks: Trait Complementarity or Exploitation Barriers? Chittka, ed. *PLoS Biology*. 5:e31.
- Saramäki et al.** (2007). Generalizations of the clustering coefficient to weighted complex net-

works. *Physical Review E*. 75:027105.

**Soffer & Vazquez.** (2005). Network clustering coefficient without degree-correlation biases. *Physical Review E*. 71:057101.

**Sokal & Rohlf.** (1962). The comparison of dendrograms by objective methods. *Taxon*:33–40.

**Solé & Montoya.** (2001). Complexity and fragility in ecological networks. *Proc Biol Sci*. 268:2039–45.

**Staniczenko et al.** (2013). The ghost of nestedness in ecological networks. *Nature Communications*. 4:1391.

**Stouffer & Bascompte.** (2010). Understanding food-web persistence from local to global scales. *Ecology letters*. 13:154–61.

**Stouffer & Bascompte.** (2011). Compartmentalization increases food-web persistence. *Proceedings of the National Academy of Sciences*. 108:3648–52.

**Stouffer et al.** (2006). A robust measure of food web intervality. *Proc Natl Acad Sci U S A*. 103:19015–20.

**Stouffer et al.** (2007). Evidence for the existence of a robust pattern of prey selection in food webs. *Proceedings of the Royal Society B: Biological Sciences*. 274:1931–40.

**Stouffer et al.** (2012). Evolutionary Conservation of Species' Roles in Food Webs. *Science*. 335:1489–92.

**Strogatz.** (2001). Exploring complex networks. *Nature*. 410:268–76.

**Strong & Leroux.** (2014). Impact of Non-Native Terrestrial Mammals on the Structure of the Terrestrial Mammal Food Web of Newfoundland, Canada. *PLOS ONE*. 9:e106264.

**Stumpf et al.** (2012). Statistical analysis of network data and evolution on GPUs: High-performance statistical computing. *Nature Precedings*.

**Thompson & Townsend.** (2000). Is resolution the solution?: the effect of taxonomic resolution on the calculated properties of three stream food webs. *Freshwater Biology*. 44:413–22.

**Thompson et al.** (2012). Food webs: reconciling the structure and function of biodiversity. *Trends in Ecology & Evolution*. 27:689–97.

**Trojelsgaard & Olesen.** (2016). Ecological networks in motion: micro- and macroscopic variability across scales. *Funct Ecol*. 30:1926–35.

**Trojelsgaard et al.** (2015). Geographical variation in mutualistic networks: similarity, turnover and partner fidelity. *Proceedings of the Royal Society B: Biological Sciences*. 282:20142925–5.

**Tylianakis & Binzer.** (2013). Effects of global environmental changes on parasitoid-host food

webs and biological control. *Biological Control*. 75:77–86.

**Tylianakis et al.** (2007). Habitat modification alters the structure of tropical hostparasitoid food webs. *Nature*. 445:202–5.

**Ulrich.** (2009). Nestedness analysis as a tool to identify ecological gradients. *Ecological Questions*. 11:27.

**Ulrich & Gotelli.** (2007). Null model analysis of species nestedness patterns. *Ecology*. 88:1824–31.

**Ulrich et al.** (2009). A consumer's guide to nestedness analysis. *Oikos*. 118:3–17.

**Vázquez et al.** (2012). The strength of plantpollinator interactions. *Ecology*. 93:719–25.

**Vellend.** (2010). Conceptual synthesis in community ecology. *Q Rev Biol*. 85:183–206.

**Vermaat et al.** (2009). Major dimensions in food-web structure properties. *Ecology*. 90:278–82.

**Vieira & Almeida-Neto.** (2015). A simple stochastic model for complex coextinctions in mutualistic networks: robustness decreases with connectance. *Ecol Lett*. 18:144–52.

**Violle et al.** (2007). Let the concept of trait be functional! *Oikos*. 116:882–92.

**Watts & Strogatz.** (1998). Collective dynamics of 'small-world' networks. *Nature*. 393:440–2.

**Weitz et al.** (2013). Phage–bacteria infection networks. *Trends Microbiol*. 21:82–91.

**Williams.** (2011). Biology, Methodology or Chance? The Degree Distributions of Bipartite Ecological Networks. Langowski, ed. *PLoS One*. 6:e17645.

**Williams & Martinez.** (2000). Simple rules yield complex food webs. *Nature*. 404:180–3.

**Wilson & Zhu.** (2008). A study of graph spectra for comparing graphs and trees. *Pattern Recognition*. 41:2833–41.

**Yaverolu et al.** (2015). Proper Evaluation of Alignment-Free Network Comparison Methods. *Bioinformatics*.

**Yeakel et al.** (2014). Collapse of an ecological network in Ancient Egypt. *PNAS*. 111:14472–7.

**Yodzis & Innes.** (1992). Body Size and Consumer-Resource Dynamics. *The American Naturalist*. 139:1151–75.

**Yodzis & Winemiller.** (1999). In search of operational trophospecies in a tropical aquatic food web. *Oikos*:327–40.

**Zook et al.** (2011). Food webs: ordering species according to body size yields high degree of intervality. *J Theor Biol*. 271:106–13.
